1 **Native and invading yellow starthistle (*Centaurea solstitialis*) microbiomes differ in**  
2 **composition and diversity of bacteria**

3

4 Patricia Lu-Irving<sup>1,2</sup>, Julia Harenčár<sup>1,3</sup>, Hailey Sounart<sup>1,4</sup>, Shana R Welles<sup>1</sup>, Sarah M Swope<sup>4</sup>,  
5 David A Baltrus<sup>5,6</sup>, and Katrina M Dlugosch<sup>1</sup>

6

7 <sup>1</sup>Department of Ecology and Evolutionary Biology, University of Arizona, Tucson, Arizona,  
8 USA; <sup>2</sup>Evolutionary Ecology, Royal Botanic Gardens Sydney, NSW, Australia; <sup>3</sup>Biological  
9 Sciences Department, California Polytechnic State University, San Luis Obispo, California,  
10 USA; <sup>4</sup>Department of Biology, Mills College, Oakland, California, USA; <sup>5</sup>School of Plant  
11 Sciences, University of Arizona, Tucson, Arizona, USA; <sup>6</sup>School of Animal and Comparative  
12 Biomedical Sciences, University of Arizona, Tucson, Arizona, USA.

13

14 Author for correspondence:

15 Patricia Lu-Irving

16 Email: [patricia.luirving@bgcp.nsw.gov.au](mailto:patricia.luirving@bgcp.nsw.gov.au)

|                                                               |      |                                     |   |
|---------------------------------------------------------------|------|-------------------------------------|---|
| Total word count (excluding summary, references and legends): | 6323 | No. of figures:                     | 6 |
| Summary:                                                      | 200  | No. of Tables:                      | 0 |
| Introduction:                                                 | 1026 | No of Supporting Information files: | 1 |
| Materials and Methods:                                        | 2122 |                                     |   |
| Results:                                                      | 1139 |                                     |   |
| Discussion:                                                   | 1899 |                                     |   |
| Acknowledgements:                                             | 136  |                                     |   |

17

## 18 **SUMMARY**

- 19 • Invasive species could benefit from introduction to locations with favorable species  
20 interactions. Microbiomes are an important source of interactions that vary across  
21 regions. We examine whether bacterial communities could explain more favorable  
22 microbial interactions in highly invasive populations of yellow starthistle.  
23
- 24 • We sequenced amplicons of prokaryotic 16S rRNA genes to characterize bacterial  
25 community composition in the phyllosphere, ectorhizosphere, and endorhizosphere of  
26 plants from seven invading populations in California, USA and eight native populations  
27 in Europe. We tested for differentiation of microbiomes by geography, plant  
28 compartment, and plant genotype.  
29
- 30 • Bacterial communities differed significantly between native and invaded ranges within  
31 plant compartments, with consistently lower diversity in plants from the invaded range.  
32 Genera containing known plant pathogens also showed lower diversity in invaded range  
33 plants. The diversity of bacteria in roots was positively correlated with plant genotype  
34 diversity within both ranges, but this relationship did not explain microbial differences  
35 between ranges.  
36
- 37 • Our findings reveal changes in the composition and diversity of bacterial interactions in  
38 invading plants, consistent with observations of altered soil interactions in this invasion.  
39 These results call for further study of the sources of variation in microbiomes and the  
40 potential for bacteria to facilitate invasion success.

41

## 42 **KEYWORDS**

43 species introductions, invasive species, microbial communities, phyllosphere, rhizosphere,  
44 endophytes, genetic diversity

45

46

47

48

## 49 INTRODUCTION

50 Humans continue to transport plant species around the globe, and increasing numbers of these  
51 translocations result in the invasive expansion of non-native species into recipient communities  
52 (Lonsdale, 1999; Butchart *et al.*, 2010; Essl *et al.*, 2011; Ellis *et al.*, 2012). While there are  
53 undoubtedly many reasons that species introductions lead to invasions, there is growing evidence  
54 that novel species interactions may facilitate the invasive spread of populations (Mitchell *et al.*,  
55 2006; Pearson *et al.*, 2018). Initially, hypotheses about the contribution of species interactions to  
56 invasions focused on the potential for non-native species to escape from above-ground  
57 herbivores, which are easily observed (Keane & Crawley, 2002), though it is not clear that  
58 herbivore escape is a frequent mechanism of invasion (Maron & Vila, 2001; Levine *et al.*, 2004;  
59 Agrawal *et al.*, 2005; Felker-Quinn *et al.*, 2013). More recently, there has been increasing  
60 recognition that microbial taxa above- and below-ground can have large effects on plant fitness,  
61 both positive and negative, and could thus determine whether invasive plants benefit from novel  
62 species interactions (Callaway *et al.*, 2004; Colautti *et al.*, 2004; Torchin & Mitchell, 2004;  
63 Agrawal *et al.*, 2005; Mitchell *et al.*, 2006; Kulmatiski *et al.*, 2008; van der Putten *et al.*, 2016;  
64 Faillace *et al.*, 2017). Plant-associated microbial communities have been historically difficult to  
65 observe, however, and studies that leverage newly-available tools to quantify differences in these  
66 interactions across native and invading populations are needed to test hypotheses for invasion  
67 success (Dawson & Schrama, 2016).

68

69 Microbial communities have emerged as particularly likely candidates for facilitating invasions.  
70 Although many interactions between plants and microbes can be beneficial, soil microbial  
71 communities often appear to have negative net effects on plant fitness which may become more  
72 negative over time, e.g., via plant-soil feedbacks (Bever, 2003; Reinhart & Callaway, 2006;  
73 Kulmatiski *et al.*, 2008; Petermann *et al.*, 2008). These interactions between plants and their  
74 microbiomes can vary over space and environment (Nemergut *et al.*, 2013; van der Putten *et al.*,  
75 2013; terHorst & Zee, 2016; Lankau & Keymer, 2018), creating opportunities for introduced  
76 plants to escape negative interactions that might characterize their native ranges. Moreover,  
77 reductions in microbial diversity are occurring in response to environmental change and human  
78 disturbances, and lowered microbial diversity may reduce the resistance of ecosystems to  
79 invasion (Schnitzer *et al.*, 2011; Wagg *et al.*, 2014; Dawson & Schrama, 2016; van der Putten *et*

80 *al.*, 2016).

81

82 Invasive plant species have provided some of the best evidence to date that microbial interactions  
83 can be locally evolved, and can vary considerably over geographic regions (Rout & Callaway,  
84 2012). Introduced plants have been shown to vary in their response to soil communities from  
85 their native and invaded ranges, and there are now many examples of more favorable interactions  
86 between plants and soil from their invaded range, consistent with escape from enemies or gain of  
87 mutualists during invasion (Reinhart *et al.*, 2003; Callaway *et al.*, 2004; Mitchell *et al.*, 2006;  
88 Engelkes *et al.*, 2008; Kulmatiski *et al.*, 2008; Maron *et al.*, 2014; van der Putten *et al.*, 2016).  
89 Plant-microbe interactions which provide relative benefits to invasive species can be explained  
90 by reduced negative effects of key microbial pathogens, increased direct beneficial effects of  
91 mutualistic taxa, or increased indirect benefits from taxa that affect competitors more negatively  
92 than they do the invader (Dawson & Schrama, 2016). It is also possible that invaders could  
93 benefit from a reduced diversity of enemy interactions, as a result of an associated reduction in  
94 ecological costs that derive from simultaneously deploying different defense responses against  
95 many different enemies (Agrawal, 2007; Colautti & Lau, 2015; Smakowska *et al.*, 2016). These  
96 hypotheses all require that there are differences in the microbial communities associated with  
97 invading vs. native plants, specifically changes in taxonomic composition, and the loss or gain of  
98 groups with pathogenic or mutualistic effects (Dawson & Schrama, 2016).

99

100 Here we conduct one of the first comparisons of plant microbiomes between invading  
101 populations and populations in their native source region. We survey plant-associated microbial  
102 communities in the highly invasive forb yellow starthistle (*Centaurea solstitialis*). Yellow  
103 starthistle is native to a wide region of Eurasia and was introduced from western Europe to South  
104 America in the 1600's and North America in the 1800's as a contaminant of alfalfa seed  
105 (Gerlach, 1997; Barker *et al.*, 2017). This herbaceous annual is a colonizer of grassland  
106 ecosystems, and is often cited as one of the '10 Worst Weeds of the West' in North America  
107 (DiTomaso & Healy, 2007). Its extensive invasion of California in the USA (>14 million acres;  
108 Pitcairn *et al.*, 2006) is particularly well-studied, and invading genotypes in this region have  
109 evolved to grow larger and produce more flowers than plants in the native range, suggesting a  
110 shift in resource allocation that has favored invasiveness (Widmer *et al.*, 2007; Eriksen *et al.*,

111 2012; Dlugosch *et al.*, 2015). Previous research has demonstrated that yellow starthistle  
112 throughout all of its native and invaded ranges experiences net fitness reductions when grown  
113 with its local soil communities (Andonian *et al.*, 2011, 2012; Andonian & Hierro, 2011). These  
114 studies have also indicated that this negative interaction is weaker (more favorable) in California,  
115 raising the possibility that changes in the microbial community have promoted an aggressive  
116 invasion.

117

118 We sample microbial communities associated with leaves (phyllosphere and endosphere) and  
119 roots (ectorhizosphere and endorhizosphere) of yellow starthistle plants in both the California  
120 invasion and native regions in Europe. Previous experiments with fungicide treatments have  
121 shown that plant-soil interactions between yellow starthistle and fungi in California are *more*  
122 negative (less favorable) than those in the native range, inconsistent with a role for fungi in  
123 beneficial species interactions in this invasion (Hierro *et al.*, 2017). Here, we focus on bacterial  
124 communities, using high-throughput sequencing of prokaryotic ribosomal 16S amplicon  
125 sequences to quantify taxonomic composition and diversity of bacteria in yellow starthistle  
126 microbiomes. Microbial communities are known to differ among plant compartments (Bulgarelli  
127 *et al.*, 2013) and to be influenced by individual plant genotype (Lundberg *et al.*, 2012; Peiffer *et*  
128 *al.*, 2013; Bodenhausen *et al.*, 2014), and so we explicitly test for differences in the microbiomes  
129 of native and invaded range plants relative to the influence of both plant compartment and plant  
130 genotype.

131

## 132 **MATERIALS AND METHODS**

### 133 **Study species**

134 Yellow starthistle (*Centaurea solstitialis* L., Asteraceae) is an obligately outcrossing annual  
135 plant, diploid throughout its range (Irmina *et al.*, 2017). Plants form a taproot and grow as a  
136 rosette through mild winter and/or spring conditions, bolting and producing flowering heads  
137 (capitula) throughout the summer. The species is native to Eurasia, where distinct genetic  
138 subpopulations have been identified in Mediterranean western Europe, central-eastern Europe,  
139 Asia (including the Middle East), and the Balkan-Apennine peninsulas (Barker *et al.*, 2017). The  
140 invasion of California as well as invasions in South America appear to be derived almost entirely  
141 from western European genotypes (Fig. 1; Barker *et al.*, 2017).

142

### 143 **Sample collection**

144 Fifteen populations of yellow starthistle were sampled for microbial communities: seven  
145 sampling sites across the invasion of California, six in western Europe, and two in eastern  
146 Europe (Fig. 1; Supporting Information Table S1). At each location, plants were sampled every  
147 meter (or to the nearest meter mark) along a 25 meter transect, to yield microbial samples from  
148 25 individual plants per population. Individuals in rosette or early bolting stages were  
149 preferentially selected. In one population (HU29), low plant density yielded 20 individuals along  
150 the 25 meter transect. Using sterile technique, plants were manually pulled and each individual  
151 sampled using modified versions of protocols by Lundberg *et al.* (2013) and Lebeis *et al.* (2015)  
152 as described below. Plants were pressed and dried after sampling, and submitted to the  
153 University of Arizona Herbarium (ARIZ; Supporting Information Table S1).

154

155 Phyllosphere and ectorhizosphere One to three basal, non-senescent leaves were collected from  
156 each plant, as well as the upper 2-5 cm of the taproot, together with accompanying lateral roots  
157 (excess soil was brushed or shaken off). Leaf and root samples were placed in individual 50 ml  
158 tubes containing 25 ml of sterile wash solution (45.9 mM NaH<sub>2</sub>PO<sub>4</sub>, 61.6 mM Na<sub>2</sub>HPO<sub>4</sub>, 0.1%  
159 Tween 20). Tubes were shaken by hand for one minute (timed). Leaf and root samples were then  
160 removed and stored on ice in separate tubes (leaves in empty tubes, roots in tubes containing 10  
161 ml of wash solution) until further processing. Wash samples were stored on ice during transport,  
162 then refrigerated at 4°C. Phyllosphere and ectorhizosphere washes were pooled across all (20 or  
163 25) plants at a location, then centrifuged at 2,200 g at 4°C for 15 minutes. Supernatants were  
164 discarded, and pellets were air-dried and stored at -20°C until DNA extraction.

165

166 Leaf endosphere Leaves were surface sterilized by submerging in bleach solution (10%  
167 commercial bleach, 0.1% tween 20) for two minutes. Leaves were then rinsed in distilled water,  
168 patted dry using a kimwipe, and sealed in individual sterile surgical envelopes (Fisherbrand #01-  
169 812-50). Envelopes were kept in silica gel desiccant until leaf tissue was completely dry, then  
170 stored at room temperature until DNA extraction.

171

172 Endorhizosphere Roots were further washed by shaking in 10 ml of wash solution until visible

173 residual soil was removed. Washed roots were stored and dried as described above for leaves.

174

175 Controls At each collection site, a tube of sterile wash solution was left uncapped while  
176 sampling plants. Disinfected tools were periodically agitated in the blank wash tube before  
177 sterilization and use for the next sample collection. For each population, rinse water and wipes  
178 used to process tissue samples were represented in controls by rinsing and wiping flame-  
179 sterilized forceps, then agitating the forceps in the blank wash tube. Controls were stored and  
180 processed in the same manner as phyllosphere and ectorrhizosphere samples.

181

## 182 **DNA extraction**

183 Extractions were carried out using sterile technique in a laminar flow hood. Leaf and root DNA  
184 were extracted from tissue pooled by sampling site (15 total populations), and as individual plant  
185 samples from 8 plants from each of 10 populations (80 total individuals). For pooled tissue  
186 extractions, equal sections of leaf tissue (50 mm<sup>2</sup>) and root tissue (12.5 mm<sup>3</sup> plus 10 mm of  
187 lateral roots) were collected from each individual sample per location and pooled prior to  
188 extraction. Control (blank) samples were collected for each batch of extractions by swabbing  
189 tools and surfaces, then extracting DNA from the swab head.

190

191 All DNA samples were extracted using the MO BIO PowerSoil kit (MO BIO Laboratories, Inc.).  
192 Phyllosphere and ectorrhizosphere DNA was extracted from up to 0.25 g of wash pellets  
193 following the standard kit protocol. Leaf and root tissues were ground to powder or sawdust  
194 consistency in liquid nitrogen using sterile mortars and pestles. Leaf and root DNA was extracted  
195 from 20 mg (leaf) or 100 mg (root) of ground tissue with the following modification to the  
196 standard protocol: tissue was incubated at 65°C for 10 minutes in extraction buffer, then vortexed  
197 for 1 minute, followed by a second 10 minute incubation (as described under “alternative lysis  
198 methods” in the kit protocol). Control DNA was extracted by placing whole swab heads directly  
199 into extraction tubes. Extracted DNA was eluted in PCR-grade water and stored at -20°C  
200 pending library preparation.

201

## 202 **Library preparation and sequencing**

203 To remove secondary compounds inhibiting PCR, DNA extracted from root and leaf tissue

204 (together with corresponding blanks) was purified using a ZR-96 genomic DNA clean-up kit  
205 (Zymo Research). All DNA concentrations were quantified using a Qubit fluorometer high-  
206 sensitivity assay for double-stranded DNA (Invitrogen), and standardized to equimolar amounts.

207

208 Library preparation followed a dual-index approach (Kozich *et al.*, 2013) using a two-step PCR  
209 protocol as follows. In the first step (target-specific PCR), the V4 region of the 16S rRNA gene  
210 was amplified using target specific primers (515F and 806R; Caporaso *et al.*, 2011) appended  
211 with common sequence (CS) tags through a linker sequence which varied from two to five  
212 nucleotides in length. Target-specific PCR was carried out using Phusion Flash master mix  
213 (Thermo Scientific) in 25  $\mu$ l reaction volume in a Mastercycler pro thermocycler (Eppendorf)  
214 under the following conditions: 25 cycles of 1 s at 98°C, 5 s at 78°C, 5 s at 57°C, 15 s at 72°C.  
215 Products were visualized on an agarose gel and diluted by up to 1:15 (depending on yield); 1  $\mu$ l  
216 of diluted product was then used as template in the second step (barcode-adapter attachment  
217 PCR). Using reagents and equipment as described above, barcoded primer pairs incorporating  
218 Illumina P5 and P7 adapters were used to amplify products from target-specific PCR in 25  $\mu$ l  
219 reaction volumes under the following conditions: 10 cycles of 1 s at 98°C, 5 s at 78°C, 5 s at  
220 51°C, 15 s at 72°C. Barcoded amplicons were quantified by fluorometry, pooled in equimolar  
221 amounts, cleaned, and submitted to the University of Idaho's IBEST Genomic Resources Core  
222 for QC and sequencing. Amplicons were multiplexed to use half the capacity of one 2  $\times$  300 bp  
223 run on an Illumina MiSeq platform. Raw sequence data are deposited in the NCBI Short Read  
224 Archive under accession number XXXXXX [pending submission].

225

226 Peptide nucleic acid clamps (PNAs) were included in both PCR steps of library preparation to  
227 block amplification of plant chloroplast and mitochondrial 16S as recommended by Lundberg *et al.*  
228 *et al.* (2013). Clamp sequences published by Lundberg *et al.* (2013) were compared with  
229 chloroplast and mitochondrial 16S sequences from yellow starthistle and three other species of  
230 Asteraceae with published organellar genomes (*Centaurea diffusa*, *Helianthus annuus*, *Lactuca*  
231 *sativa*). We found a single nucleotide mismatch between the Asteraceae chloroplast 16S and the  
232 plastid PNA sequences, and designed an alternative plastid PNA specific to the Asteraceae  
233 sequence (5'—GGCTCAACTCTGGACAG—3') (Fitzpatrick *et al.*, in revision). All samples for  
234 this study were amplified using the plastid PNA of our design, together with the mitochondrial



235 PNA published by Lundberg *et al.* (2013). To gauge the effectiveness of our alternative PNA,  
236 two duplicate samples were processed using both PNAs published by Lundberg *et al.* (2013).

237

### 238 **Identification of operational taxa and potential plant pathogens**

239 Demultiplexed paired reads were merged and quality filtered using tools from the USEARCH  
240 package version 9.0.2132 (Edgar & Flyvbjerg, 2015). Merged reads were truncated to uniform  
241 length and primer sequences were removed using a combination of the seqtk toolkit version 1.2  
242 (github.com/lh3/seqtk) and a custom script. The UPARSE pipeline (Edgar, 2013) implemented  
243 in the USEARCH package was used for further data processing and analysis: unique sequences  
244 were identified, and those represented only once or twice in the processed read set were  
245 discarded as likely PCR or sequencing errors. Remaining sequences were clustered into  
246 operational taxonomic units (OTUs) at a 97% threshold, chimeras were filtered out, and per-  
247 sample OTU read counts were tabulated using the UPARSE-OTU algorithm. Assignment of  
248 OTUs to nearest taxonomic match in the Greengenes database (McDonald *et al.*, 2012) was  
249 carried out using the UCLUST algorithm implemented in QIIME version 1.9.1 (Caporaso *et al.*,  
250 2010; Edgar, 2010). Data were further processed using tools from the QIIME package: reads  
251 mapping to chloroplast and mitochondrial OTUs were removed, and samples were rarefied by  
252 plant compartment. Rarefaction levels were chosen to reflect the distribution of read counts per  
253 sample within plant compartments, subsampling to the minimum number of reads necessary to  
254 include all samples except those that were outliers for low read count.

255

256 Taxa known to contain plant pathogens were identified using the FAPROTAX database (version  
257 1.1, (Louca *et al.*, 2016). A list of all genera included under the “plant pathogen” functional  
258 category was used to filter our OTU tables by taxonomic assignment. While pathogen-containing  
259 genera are likely to include both pathogenic and non-pathogenic strains (Newton *et al.*, 2010),  
260 our pathogen-containing OTU dataset should be enriched for potential plant pathogens, relative  
261 to the full dataset.

262

### 263 **Microbial community analyses**

264 All statistical analyses were performed in R (R Core Team, 2015). We evaluated differences in  
265 bacterial community composition between plant compartments, and between native and invaded

266 ranges within plant compartments, by performing non-metric multidimensional scaling (NMDS)  
267 using the R packages *vegan* (Oksanen *et al.*, 2016) and *MASS* (Venables & Ripley, 2002).  
268 Individual plant samples or samples pooled within sampling site provided replicates in these  
269 comparisons. Ordinations were based on Bray-Curtis distances, and were performed using a two-  
270 dimensional configuration to minimize stress, using Wisconsin double standardized and square  
271 root transformed data, with expanded weighted averages of species scores added to the final  
272 NMDS solution. Significant differences among plant compartments and between native and  
273 invaded samples were assessed using the *envfit* function in *vegan*. Ellipses were drawn on  
274 NMDS plots using the *vegan* function *ordiellipse*, representing 95% confidence limits of the  
275 standard error of the weighted average of scores.

276

277 We further explored the underlying correlates of bacterial community variation using Principal  
278 Components Analysis (PCA; using R function *prcomp*) for samples from native and invaded  
279 ranges within each plant compartment. Prior to performing the PCA, we performed Hellinger's  
280 transformation to minimize the influence of OTUs with low counts or many zeros (Legendre &  
281 Legendre, 1998; Legendre & Gallagher, 2001; Ramette, 2007). We then identified the OTUs  
282 with the highest loading on the dominant PC axis of variation by examining the matrix of  
283 variable loadings produced by *prcomp*. The OTU composition of samples pooled by sampling  
284 site (phyllosphere, ectorhizosphere, and endorhizosphere samples; hereafter 'pooled samples')  
285 was visualized using a heatmap generated in *ggplot2* (Wickham, 2009), and samples were  
286 hierarchically clustered by Bray-Curtis dissimilarity (*hclust* function in R) using McQuitty's  
287 method (McQuitty, 1966).

288

289 We compared the diversity of OTUs between the native and invaded range for each plant  
290 compartment using richness (R), evenness (Pielou's J; Pielou, 1966), and their combined effects  
291 via the Hill series exponent  $e^{H'}$  (Hill, 1973) of the Shannon diversity index ( $H'$ ; Shannon, 1948).  
292 Again, individual plant samples or samples pooled by sampling site provided replicates in these  
293 comparisons. Diversity values were calculated using the packages *vegan* and *iNEXT* (Hsieh *et*  
294 *al.*, 2016), and compared between native and invaded ranges using a nonparametric Kruskal-  
295 Wallis rank sum test on rarefied read counts. For plant tissue samples that included multiple  
296 individuals per site, we compared diversity between regions using a nested ANOVA with fixed

297 effects of region and population nested within region, and among sites using a post hoc Kruskal-  
298 Wallis test within regions. We conducted these comparisons on a dataset including all OTUs, and  
299 a reduced dataset including only OTUs assigned to genera with known plant pathogens  
300 according to the FAPROTAX database, as described above.

301

302 Finally, we examined the influence of plant genotype on microbial composition. Our geographic  
303 regions correspond to genetically differentiated subpopulations, and within these regions, our  
304 study sites are also known to vary in plant genetic diversity (Barker *et al.*, 2017). Microbial  
305 diversity estimates ( $e^H$ ) for each plant compartment were predicted using linear models that  
306 included fixed effects of plant genetic diversity, region (native vs. invaded), and the interaction  
307 between these two effects. Measurements of plant genetic diversity at each of our sampling sites  
308 were obtained from previously published genome-wide marker analyses by Barker and  
309 colleagues (Barker *et al.*, 2017), calculated as the average proportion of pairwise nucleotide  
310 differences between alleles ( $\pi$ ) at variable positions across the yellow starthistle genome.

311

## 312 **RESULTS**

### 313 **Sequencing and data processing**

314 Sequencing yielded 9,672,898 read pairs, of which 6,217,852 remained after merging and quality  
315 control; these were 253 bp in length after removing artificial and primer sequences. The number  
316 of raw read counts per sample ranged from 16 to 306,200 with a median of 21,964. Analysis of  
317 the merged and processed reads resulted in 4,014 OTUs, of which 60 were identified as plastid or  
318 mitochondrial, and 428 were unidentifiable (11%). Of the remaining 3,526, 206 were identified  
319 to species (6%), 1,084 to genus (27%), and 2,229 to family (56%). A total of 103 OTUs (3%)  
320 were identified as members of the 49 genera with known plant pathogens in the FAPROTAX  
321 v.1.1 database.

322

323 Sequence reads representing yellow starthistle chloroplast and mitochondrial 16S accounted for  
324 40% and 1% of all reads, respectively. Amplification of host chloroplast in samples using the  
325 Asteraceae-specific plastid PNA was reduced by up to 51% compared with the Lundberg *et al.*  
326 (2013) PNA (Supporting Information Table S2). Despite PNA blocking activity, 83% of the total  
327 reads from leaf endosphere samples were yellow starthistle chloroplast sequences. After removal

328 of chloroplast and mitochondrial reads, remaining read counts for most leaf endosphere samples  
329 were low relative to controls (Supporting Information Fig. S1), so no further analysis of leaf  
330 endosphere bacterial communities was performed.

331

332 Rarefaction levels (chosen to reflect the minimum number of reads per sample by compartment,  
333 not including outliers) were 18,000 reads per sample for phyllosphere, 17,000 for  
334 ectorrhizosphere, and 5,000 for endorhizosphere samples (Supporting Information Fig. S1). These  
335 levels were also higher than nearly all control samples. Rarefaction cutoffs resulted in the  
336 exclusion of five non-control samples which were outliers for low read count: one phyllosphere  
337 (DIA), one ectorrhizosphere (SAZ), and three individual endorhizosphere samples (two from  
338 SAZ; one from SIE). An NMDS ordination of all un-rarefied samples showed that the controls  
339 clustered together and were clearly differentiated from all samples in all plant compartments  
340 other than the leaf endosphere (Supporting Information Fig. S2).

341

#### 342 **Microbial community analyses**

343 Results from NMDS ordinations indicated that bacterial communities differed overall among the  
344 phyllosphere, ectorrhizosphere, and endorhizosphere compartments (Fig. 2a; stress = 0.14,  $P =$   
345 0.001). Within compartments, NMDS further revealed significant differences between native and  
346 invaded range endorhizosphere samples (Fig. 2b; stress = 0.16,  $P = 0.001$ ) and ectorrhizosphere  
347 samples ( $P = 0.001$ ). Native and invaded range phyllosphere samples differed with marginal  
348 significance ( $P = 0.05$ ). Clustering analyses within the phyllosphere and ectorrhizosphere  
349 compartments consistently grouped invaded range samples together, as well as samples from the  
350 source region in western Europe (Supporting Information Fig. S3). Native range samples from  
351 eastern Europe (HU01 and HU29) clustered together in these compartments but were variable in  
352 their relationship to the other regions. Endorhizosphere samples pooled by location showed less  
353 consistent clustering by range.

354

355 The dominant phyla among all bacterial communities were Proteobacteria, Actinobacteria,  
356 Bacteroidetes, and Firmicutes (Fig. 3). Principal component analyses suggested that the strongest  
357 contributions to changes in bacterial community composition between the native and invaded  
358 ranges were made by shifts in the representation of *Bacillus* (Firmicutes), *Chryseobacterium*

359 (Bacteroidetes), and the Proteobacteria taxa *Erwinia*, *Pseudomonas*, and Xanthomonadaceae  
360 (Supporting Information Table S3; Fig. S4). All of these taxa other than *Chryseobacterium*  
361 include known plant pathogens in the FAPROTAX v.1.1 database (Louca *et al.*, 2016).

362

363 In general, bacterial OTUs showed a pattern of lower median richness (R), evenness (J), and  
364 diversity ( $e^H$ ) for plants from invaded range sites in all compartments, with the exception of  
365 richness in the phyllosphere (Figs 4, 5). Within the phyllosphere, invaders were not significantly  
366 different in richness ( $\chi^2_1 = 1.67, P = 0.20$ ), were significantly lower in evenness ( $\chi^2_1 = 8.07, P =$   
367  $0.005$ ), and were marginally lower in Hill diversity ( $\chi^2_1 = 3.75, P = 0.05$ ), relative to native range  
368 plants. Similarly, the ectorrhizosphere of invaders was not significantly different in richness ( $\chi^2_1 =$   
369  $0.69, P = 0.41$ ), and was significantly lower in both evenness ( $\chi^2_1 = 5.0, P = 0.03$ ) and diversity  
370 ( $\chi^2_1 = 6.21, P = 0.01$ ). In contrast, endorhizosphere samples pooled by site did not differ  
371 significantly in evenness ( $\chi^2_1 = 2.26, P = 0.13$ ), but were marginally significantly lower in  
372 richness ( $\chi^2_1 = 3.43, P = 0.06$ ) and diversity ( $\chi^2_1 = 3.01, P = 0.08$ ). Nested ANOVA of individual  
373 endorhizosphere samples indicated strongly significant reductions in richness, evenness, and  
374 diversity in invading plants (Fig 5; fixed effect of region: all  $P < 0.001$ ). For individual  
375 endorhizosphere samples, populations did not differ significantly in any metrics within  
376 native/invaded regions, with the exception of significantly higher evenness in plants at site SIE  
377 relative to site TRI in the invaded range.

378

379 Filtering the rarefied datasets for genera containing known plant pathogens resulted in 49  
380 phyllosphere OTUs, 69 ectorrhizosphere OTUs, and 88 endorhizosphere OTUs enriched for  
381 potential plant pathogens. *Pseudomonas* and *Erwinia* were among the most common pathogen-  
382 containing genera encountered in each plant compartment in both ranges. The phyllosphere also  
383 included a high frequency of *Janthinobacterium*, with a relative increase in *Serratia* in the  
384 invaded range. In the ectorrhizosphere, *Serratia* was common in both ranges, but invading plants  
385 showed a large relative decline in *Erwinia* and increase in *Pseudomonas*. In the endorhizosphere,  
386 invading plant harbored less *Pseudomonas* and more *Bacillus* and *Streptomyces* than native  
387 plants (Supporting Information Fig. S5). Diversity of these OTUs showed similar trends to total  
388 diversity, with lower median values in invaded range root compartments. No differences between  
389 regions were statistically significant for the phyllosphere ( $\chi^2_1 = 0.60, P = 0.44$ ) or

390 ectorrhizosphere ( $\chi^2_1 = 0.49$ ,  $P = 0.48$ ). For the endorhizosphere samples pooled by site,  
391 significantly lower diversity was indicated in the invaded range ( $\chi^2_1 = 4.34$ ,  $P = 0.04$ ). For  
392 individual endorhizosphere samples, nested ANOVA also indicated significantly lower diversity  
393 in the invaded range ( $P < 0.0001$ ), and no significant differences among populations within  
394 regions.

395

396 The diversity of bacteria in root compartments showed evidence of associations with plant  
397 genetic diversity at sampling sites. A linear model predicting microbial diversity ( $e^H$ ) from plant  
398 genetic diversity was significant for endorhizosphere samples pooled by site (Fig. 6;  $F_{(2,12)} =$   
399  $5.89$ ;  $P = 0.02$ ;  $r^2_{\text{adj}} = 0.41$ ), with significant main effects of both plant genetic diversity ( $P =$   
400  $0.03$ ) and region (native vs. invaded;  $P = 0.006$ ). The interaction between these two effects was  
401 not significant ( $P = 0.71$ ) and was removed from the final model. This same pattern was  
402 marginally significant when using only OTUs from pathogen-containing genera in the  
403 endorhizosphere samples (effect of plant genetic diversity:  $P = 0.08$ ). Similar linear models did  
404 not identify significant effects of plant genetic diversity when predicting the median diversity of  
405 individual plant endorhizosphere samples ( $P = 0.74$ ), or diversity in the phyllosphere ( $P = 0.35$ ).  
406 There was a marginally significant positive effect of plant genetic diversity on diversity in the  
407 ectorrhizosphere ( $P = 0.08$ ) again in addition to the effect of region ( $P = 0.002$ ).

408

## 409 **DISCUSSION**

410 Introduced plants will encounter a variety of novel species interactions as they establish across  
411 biogeographic regions. For many plants, severe invasions are associated with more favorable  
412 interactions with soil microbial communities (Andonian & Hierro, 2011; Dawson & Schrama,  
413 2016). We found that bacterial microbiomes of invading yellow starthistle were unique in  
414 composition and lower in diversity relative to bacterial microbiomes of native plants, differences  
415 that persisted within plant compartments and across variation in plant genetic diversity.

416

417 As observed in other species, bacterial communities differed most among plant compartments  
418 (Bulgarelli *et al.*, 2013; Vandenkoornhuys *et al.*, 2015). The numbers and diversity of taxa  
419 within each compartment were similar in magnitude to those reported in other studies of  
420 prokaryotic 16S sequences, e.g. from Agavaceae (Coleman-Derr *et al.*, 2016), Brassicaceae

421 (Bodenhausen *et al.*, 2013), Cactaceae (Fonseca-García *et al.*, 2016), and other Asteraceae (Leff  
422 *et al.*, 2016). The dominant phyla were Proteobacteria, Actinobacteria, Bacteroidetes, and  
423 Firmicutes, which are also characteristic of plant-associated bacterial communities surveyed to  
424 date (Bulgarelli *et al.*, 2013). The exception was the leaf endosphere, where a paucity of  
425 sequences relative to controls suggests that persistent chloroplast contamination obscured low  
426 frequency endophytes, despite our development of an Asteraceae-specific PNA (FitzPatrick *et*  
427 *al.*, submitted). A targeted survey is needed to better characterize this compartment (e.g. qPCR,  
428 (Fierer *et al.*, 2005).

429

430 Notably, diversity was approximately twice as high in the endorhizosphere as in the  
431 ectorhizosphere. Current reviews have concluded that root endosphere communities are typically  
432 less diverse than those in the ectorhizosphere (Bulgarelli *et al.*, 2013; Vandenkoornhuysen *et al.*,  
433 2015). Our root collections were washed but not surface sterilized and may represent some of the  
434 rhizoplane/rhizosphere in addition to the endosphere, elevating our estimates of diversity. It is  
435 also possible that yellow starthistle deviates from initially reported patterns, which have also  
436 been challenged by other recent studies (Fonseca-García *et al.*, 2016; Leff *et al.*, 2016).

437

438 Within compartments, community composition was consistently different between samples from  
439 native and invaded ranges and included shifts in taxa across all major groups. Our native range  
440 samples represented a larger geographic area and spanned distinct genetic subpopulations of  
441 yellow starthistle, but native range sites clustered together in overall community composition and  
442 there was little evidence of individual site differences within ranges. Between ranges, the  
443 diversity of OTUs was lower in the invaded range, a pattern that was dominated by lower  
444 evenness of OTUs in both the phyllosphere and ectorhizosphere, and by lower richness of OTUs  
445 in the endorhizosphere. Thus invading plants were more strongly dominated by a few taxa at  
446 high relative abundance on root and leaf surfaces, and harbored fewer bacterial taxa in their root  
447 endophytic communities.

448

449 We observed a significant positive association between root microbial diversity and genotypic  
450 diversity among plants at the population scale. This association was strongest in the  
451 endorhizosphere, the only endophytic compartment in our analysis, consistent with plant

452 genotype having the largest influence on microbial taxa colonizing within the plant itself  
453 (Bulgarelli *et al.*, 2012; Lundberg *et al.*, 2012; Lebeis *et al.*, 2015). Within-species plant  
454 genotype effects have been observed previously and may interact with the effect of environment  
455 to shape microbial communities (Peiffer *et al.*, 2013; terHorst & Zee, 2016). Interactions  
456 between plant and microbial diversity could be particularly important for invasive species, where  
457 genetic bottlenecks during establishment and range expansion can reduce genetic diversity  
458 among plants (Dlugosch & Parker, 2008; Excoffier *et al.*, 2009; Uller & Leimu 2011).  
459 Nevertheless, it appears that genotype effects are often minor relative to site effects (Lundberg *et al.*  
460 *al.*, 2012; Peiffer *et al.*, 2013; Bodenhausen *et al.*, 2014; Bulgarelli *et al.*, 2015), and we found  
461 that genotypic effects were evident only within region and did not explain microbial diversity  
462 differences between regions.

463

464 The microbial differences that we observed across ranges are similar to those observed at  
465 continental scales (Bodenhausen *et al.*, 2013; Peiffer *et al.*, 2013). A variety of factors may  
466 explain these patterns, particularly abiotic differences (Fierer & Jackson, 2006; Bulgarelli *et al.*,  
467 2013; Nemergut *et al.*, 2013; Vandenkoornhuyse *et al.*, 2015). Soil type appears to have a strong  
468 influence on microbial communities (e.g. Bulgarelli *et al.*, 2012; Lundberg *et al.*, 2012), and is  
469 known to differ broadly across yellow starthistle's range (Hierro *et al.*, 2017). In addition,  
470 populations in California are at the warm and dry extreme of yellow starthistle's climatic niche  
471 (Dlugosch *et al.*, 2015), and our sampling was conducted at the end of a period of severe drought  
472 (Griffin & Anchukaitis, 2014; Diffenbaugh *et al.*, 2015), which could have amplified microbial  
473 differences related to climate (Schrama & Bardgett, 2016). Interestingly, a recent study of  
474 grassland plants found that microbial diversity increased under drought, whereas we found  
475 reduced diversity in the drought-affected range (terHorst *et al.*, 2014).

476

477 Importantly, yellow starthistle's invasion could also cause changes to microbial communities.  
478 Species invasionss have been shown to alter microbial composition over short timescales  
479 (Collins *et al.*, 2016; Gibbons *et al.*, 2017), though long term effects are less clear (Lankau,  
480 2011; Day *et al.*, 2015). Yellow starthistle invasions are denser than populations in the native  
481 range by an order of magnitude or more (Uygur *et al.*, 2004; Andonian *et al.*, 2011), and include  
482 lower diversity of plant species overall (Seabloom *et al.*, 2003; Zavaleta & Hulvey, 2004;



483 D'Antonio *et al.*, 2007). Low plant diversity can depress the diversity of microbes in the  
484 environment and in plants (Garbeva *et al.*, 2004; Schnitzer *et al.*, 2011; Coleman-Derr *et al.*,  
485 2016). Invading plants in California also grow to larger size, and could allow particular strains to  
486 proliferate if size increases were gained at a cost to defenses (Huot *et al.*, 2014; Dlugosch *et al.*,  
487 2015). These possibilities mean that invasions could be a cause rather than an effect of weaker  
488 plant-soil interactions for invasive species in their introduced ranges (Kulmatiski *et al.*, 2008;  
489 Dawson & Schrama, 2016), reinforcing a growing need for explicit observational and  
490 experimental tests that disentangle associations between microbial diversity and plant density,  
491 plant community diversity, and environmental gradients (Dawson & Schrama, 2016).

492

493 To date, few studies have compared microbial community compositionl between the native and  
494 introduced ranges of invasive plants. McGinn and colleagues (2016) reported no differences in  
495 the diversity of mutualistic fungal taxa associated with the roots of multiple species of European  
496 *Trifolium* introduced to New Zealand, despite more favorable soil interactions in the invasions  
497 (McGinn *et al.*, 2018; but see Parker & Gilbert, 2007. Johansen and colleagues (2017) found  
498 *increased* diversity of fungal communities on the roots of European *Ammophila arenaria*  
499 invading Australia and New Zealand, though there appear to be no differences in interactions  
500 with soil microbial communities in its invasions (in North America; Beckstead & Parker, 2003).  
501 Gundale and colleagues explored the potential contribution of fungal endophyte communities to  
502 more favorable (negative) soil interactions observed in introduced plantations of lodgepole pine  
503 (*Pinus contorta*) from North America (Gundale *et al.*, 2014; 2016). For lodgepole pine,  
504 microbial communities differed among several global regions examined, but there was no  
505 consistent pattern of loss of potential fungal pathogens or gain of mutualists in the introductions,  
506 and it remains unclear what part of the soil community is responsible for observed differences in  
507 interactions across ranges (Gundale *et al.*, 2016). Reinhart and colleagues (2010) focused  
508 specifically on *Phythium* fungal pathogens and quantified their virulence on North American  
509 *Prunus serotina* introduced to Europe. They found that the most virulent strains occurred only in  
510 the native range, consistent with benefits to invading plants escaping components this specific  
511 pathogenic group. In the only microbiome comparison that included bacterial taxa, Finkel and  
512 colleagues (Finkel *et al.*, 2011; 2016) explored the phyllosphere community of multiple species  
513 of *Tamarix* in native and introduced parts of their ranges, finding that microbial communities

514 were in general most strongly structured by geographic region.

515

516 Our study is the first to find consistent differences in the microbiomes of native and invading  
517 plants which coincide with fitness differences in plant interactions with soil communities.

518 Among the few invader microbiome studies to date, ours is unusual in focusing on the bacterial  
519 community. Fungi have historically received more attention for their fitness effects on plants, but  
520 bacteria can also play a critical role both as pathogens and mutualists (Haney *et al.*, 2015;

521 Vandenkoornhuyse *et al.*, 2015; Herrera Paredes & Lebeis, 2016). For yellow starthistle,  
522 previous experiments have demonstrated that fungal communities are not responsible for more  
523 favorable conditions in the invaded range (Hierro *et al.*, 2017), and our findings indicate that  
524 bacterial communities warrant further investigation as the potential source of these differences.

525 The fitness effects of our specific OTUs are unknown, however, and identifying the bacterial  
526 OTUs that accumulate during interactions with plants would help to elucidate important  
527 pathogenic or mutualistic taxa, and allow field surveys to explicitly test hypotheses that these  
528 strains are lost or gained in the invaded environment.

529

530 We have previously argued that yellow starthistle has benefitted from the historical loss of plant  
531 competitors in California (Dlugosch *et al.*, 2015). Disturbance is critical for yellow starthistle  
532 establishment, and functionally similar native species compete well against it in experiments;  
533 however, key competitors have been lost from the ecosystem due to perturbations prior to yellow  
534 starthistle invasion (Zavaleta & Hulvey, 2004; Hooper & Dukes, 2010; Hierro *et al.*, 2011, 2017;  
535 Hulvey & Zavaleta, 2012). Any benefits of altered bacterial communities could be independent  
536 of competition with native plant species, but these factors might also interact. Increased density  
537 due to a lack of competition could have reduced plant-associated microbial diversity, as  
538 described above. Yellow starthistle experiences negative plant-soil feedbacks across generations  
539 (Andonian *et al.*, 2011), however, and the build up of high plant densities is therefore unlikely to  
540 generate more favorable soil interactions. Alternatively, the historical loss of native species  
541 diversity in California (D'Antonio *et al.*, 2007) could have resulted in the loss of associated  
542 microbial diversity (Garbeva *et al.*, 2004; Schnitzer *et al.*, 2011; Coleman-Derr *et al.*, 2016),  
543 generating particularly strong opportunities for invasion into a system with both reduced plant  
544 competition and reduced pathogen diversity. Microbial surveys of remnant native communities,

545 as well as across densities of yellow starthistle would facilitate tests of alternative hypotheses for  
546 interacting effects of plant and microbial diversity, and it may be informative to explore  
547 microbial communities preserved on native plant specimens pre-dating the extensive invasion of  
548 yellow starthistle into this region.

549

## 550 **Conclusions**

551 We found consistent differences between native and invading yellow starthistle plants in their  
552 bacterial microbiomes. These differences were robust to additional variation associated with  
553 plant compartment and the diversity of plant genotypes. Invaded range microbiomes differed in  
554 composition across major taxonomic groups, and harbored a lower diversity of bacteria,  
555 including reduced evenness on the surface of leaves and roots and reduced richness of root  
556 endophytes. We suggest that bacteria could be the source of more favorable microbial  
557 interactions that have been observed in this invasion. Our findings also raise questions about 1)  
558 whether lower bacterial diversity is a feature of the invaded environment or whether it is caused  
559 by the invasion itself, and 2) how differences in the microbial community might have interacted  
560 with other changes in plant competitive interactions and the abiotic environment to affect plant  
561 fitness. These questions highlight the need for additional studies that compare microbial  
562 communities (including bacteria) associated with native and invading populations, that couple  
563 microbial community identification with plant-soil feedback and fitness experiments, and that  
564 examine the interaction of environment, plant diversity, and plant density on microbial  
565 communities and their fitness effects on plants.

566

## 567 **ACKNOWLEDGMENTS**

568 We thank D. Lundberg and S. Lebeis for helpful discussions regarding sampling design; G.  
569 Reardon and C. Chandeyson for assistance with field collections; E. Arnold, J. Aspinwall, J.  
570 Braasch, E. Carlson, K. Hockett, P. Humphries, T. O'Connor, M. Schneider, J. U'Ren, and N.  
571 Zimmerman for 16S library preparation assistance and discussion; A. Gerritsen, D. New and  
572 staff at iBEST for assistance with sequencing; K. Andonian, J. Hierro, and 3 reviewers for  
573 helpful feedback on the manuscript. We are particularly indebted to C.E. Morris for hosting the  
574 European sample processing at INRA Station de Pathologie Végétale, Montfavet, France. Data  
575 collection and analyses performed by the iBEST Genomics Resources Core at the University of

576 Idaho were supported in part by NIH COBRE grant P30GM103324. This study was supported  
577 by USDA grant 2015-67013-23000 to K.M.D., D.A.B., and S.M.S.

578

#### 579 AUTHOR CONTRIBUTIONS

580 P.L-I., D.A.B., and K.M.D. designed the study. P.L-I. and J.H. collected the samples with  
581 assistance from H.S., S.M.S., and S.R.W. P.L-I conducted the microbial sequencing and  
582 bioinformatics. P.L-I, S.R.W., and K.M.D. analyzed the data. P.L-I and K.M.D. wrote the  
583 manuscript, which was edited by all authors.

584

#### 585 REFERENCES

- 586 **Agrawal AA. 2007.** Macroevolution of plant defense strategies. *Trends in Ecology & Evolution*  
587 **22:** 103–109.
- 588 **Agrawal AA, Kotanen PM, Mitchell CE, Power AG, Godsoe W, Klironomos J. 2005.**  
589 Enemy release? an experiment with congeneric plant pairs and diverse above- and  
590 belowground enemies. *Ecology* **86:** 2979–2989.
- 591 **Andonian K, Hierro JL. 2011.** Species interactions contribute to the success of a global plant  
592 invader. *Biological Invasions* **13:** 2957–2965.
- 593 **Andonian K, Hierro JL, Khetsuriani L, Becerra PI, Janoyan G, Villareal D, Cavieres LA,**  
594 **Fox LR, Callaway RM. 2012.** Geographic mosaics of plant-soil microbe interactions in a  
595 global plant invasion. *Journal of Biogeography* **39:** 600–608.
- 596 **Andonian K, Hierro JL, Khetsuriani L, Becerra P, Janoyan G, Villarreal D, Cavieres L,**  
597 **Fox LR, Callaway RM. 2011.** Range-expanding populations of a globally introduced weed  
598 experience negative plant-soil feedbacks. *PLoS One* **6:** e20117.
- 599 **Barker BS, Andonian K, Swope SM, Luster DG, Dlugosch KM. 2017.** Population genomic  
600 analyses reveal a history of range expansion and trait evolution across the native and invaded  
601 range of yellow starthistle (*Centaurea solstitialis*). *Molecular Ecology* **26:** 1131–1147.
- 602 **Beckstead J, Parker IM. 2003.** Invasiveness of *Ammophila arenaria*: release from soil-borne  
603 pathogens? *Ecology* **84:** 2824–2831.
- 604 **Bever JD. 2003.** Soil community feedback and the coexistence of competitors: conceptual  
605 frameworks and empirical tests. *The New Phytologist* **157:** 465–473.
- 606 **Bodenhausen N, Bortfeld-Miller M, Ackermann M, Vorholt JA. 2014.** A synthetic

- 607 community approach reveals plant genotypes affecting the phyllosphere microbiota. *PLoS*  
608 *Genetics* **10**: e1004283.
- 609 **Bodenhause N, Horton MW, Bergelson J. 2013.** Bacterial communities associated with the  
610 leaves and the roots of *Arabidopsis thaliana*. *PLoS One* **8**: e56329.
- 611 **Bulgarelli D, Garrido-Oter R, Münch PC, Weiman A, Dröge J, Pan Y, McHardy AC,**  
612 **Schulze-Lefert P. 2015.** Structure and function of the bacterial root microbiota in wild and  
613 domesticated barley. *Cell Host & Microbe* **17**: 392–403.
- 614 **Bulgarelli D, Rott M, Schlaeppi K, Ver Loren van Themaat E, Ahmadinejad N, Assenza F,**  
615 **Rauf P, Huettel B, Reinhardt R, Schmelzer E, et al. 2012.** Revealing structure and  
616 assembly cues for *Arabidopsis* root-inhabiting bacterial microbiota. *Nature* **488**: 91–95.
- 617 **Bulgarelli D, Schlaeppi K, Spaepen S, Ver Loren van Themaat E, Schulze-Lefert P. 2013.**  
618 Structure and functions of the bacterial microbiota of plants. *Annual Review of Plant Biology*  
619 **64**: 807–838.
- 620 **Butchart SHM, Walpole M, Collen B, van Strien A, Scharlemann JPW, Almond REA,**  
621 **Baillie JEM, Bomhard B, Brown C, Bruno J, et al. 2010.** Global biodiversity: indicators of  
622 recent declines. *Science* **328**: 1164–1168.
- 623 **Callaway RM, Thelen GC, Rodriguez A, Holben WE. 2004.** Soil biota and exotic plant  
624 invasion. *Nature* **427**: 731–733.
- 625 **Caporaso JG, Kuczynski J, Stombaugh J, Bittinger K, Bushman FD, Costello EK, Fierer**  
626 **N, Peña AG, Goodrich JK, Gordon JI, et al. 2010.** QIIME allows analysis of high-  
627 throughput community sequencing data. *Nature Methods* **7**: 335–336.
- 628 **Caporaso JG, Lauber CL, Walters WA, Berg-Lyons D, Lozupone CA, Turnbaugh PJ,**  
629 **Fierer N, Knight R. 2011.** Global patterns of 16S rRNA diversity at a depth of millions of  
630 sequences per sample. *Proceedings of the National Academy of Sciences* **108 Suppl 1**: 4516–  
631 4522.
- 632 **Colautti RI, Lau JA. 2015.** Contemporary evolution during invasion: evidence for  
633 differentiation, natural selection, and local adaptation. *Molecular Ecology* **24**: 1999–2017.
- 634 **Colautti RI, Ricciardi A, Grigorovich IA, MacIsaac HJ. 2004.** Is invasion success explained  
635 by the enemy release hypothesis? *Ecology Letters* **7**: 721–733.
- 636 **Coleman-Derr D, Desgarenes D, Fonseca-Garcia C, Gross S, Clingenpeel S, Woyke T,**  
637 **North G, Visel A, Partida-Martinez LP, Tringe SG. 2016.** Plant compartment and

- 638 biogeography affect microbiome composition in cultivated and native *Agave* species. *The*  
639 *New Phytologist* **209**: 798–811.
- 640 **Collins CG, Carey CJ, Aronson EL, Kopp CW, Diez JM. 2016.** Direct and indirect effects of  
641 native range expansion on soil microbial community structure and function. *The Journal of*  
642 *Ecology* **104**: 1271–1283.
- 643 **D’Antonio CM, Malmstrom C, Reynolds SA, Gerlach J. 2007.** Ecology of invasive non-  
644 native species in California grassland. In: Stromberg MR, Corbin JD, D’Antonio CM, eds.  
645 *California grassland: ecology and management*. Berkeley, CA, USA: University of  
646 California Press, 67–86.
- 647 **Dawson W, Schrama M. 2016.** Identifying the role of soil microbes in plant invasions. *The*  
648 *Journal of Ecology* **104**: 1211–1218.
- 649 **Day NJ, Dunfield KE, Antunes PM. 2015.** Temporal dynamics of plant-soil feedback and root-  
650 associated fungal communities over 100 years of invasion by a non-native plant. *The Journal*  
651 *of Ecology* **103**: 1557–1569.
- 652 **Diffenbaugh NS, Swain DL, Touma D. 2015.** Anthropogenic warming has increased drought  
653 risk in California. *Proceedings of the National Academy of Sciences* **112**: 3931–3936.
- 654 **DiTomaso JM, Healy EA. 2007.** *Weeds of California and other western states*. Oakland, CA,  
655 USA: University of California Department of Agriculture and Natural Resources.
- 656 **Dlugosch KM, Cang FA, Barker BS, Andonian K, Swope SM, Rieseberg LH. 2015.**  
657 Evolution of invasiveness through increased resource use in a vacant niche. *Nature Plants* **1**:  
658 15066.
- 659 **Dlugosch KM, Parker IM. 2008.** Founding events in species invasions: genetic variation,  
660 adaptive evolution, and the role of multiple introductions. *Molecular Ecology* **17**: 431–449.
- 661 **Edgar RC. 2010.** Search and clustering orders of magnitude faster than BLAST. *Bioinformatics*  
662 **26**: 2460–2461.
- 663 **Edgar RC. 2013.** UPARSE: highly accurate OTU sequences from microbial amplicon reads.  
664 *Nature Methods* **10**: 996–998.
- 665 **Edgar RC, Flyvbjerg H. 2015.** Error filtering, pair assembly and error correction for next-  
666 generation sequencing reads. *Bioinformatics* **31**: 3476–3482.
- 667 **Ellis EC, Antill EC, Kreft H. 2012.** All is not loss: plant biodiversity in the anthropocene. *PLoS*  
668 *One* **7**: e30535.

- 669 **Engelkes T, Morriën E, Verhoeven KJF, Bezemer TM, Biere A, Harvey JA, McIntyre LM,**  
670 **Tamis WLM, van der Putten WH. 2008.** Successful range-expanding plants experience  
671 less above-ground and below-ground enemy impact. *Nature* **456**: 946–948.
- 672 **Eriksen RL, Desronvil T, Hierro JL, Kesseli R. 2012.** Morphological differentiation in a  
673 common garden experiment among native and non-native specimens of the invasive weed  
674 yellow starthistle (*Centaurea solstitialis*). *Biological Invasions* **14**: 1459–1467.
- 675 **Essl F, Dullinger S, Rabitsch W, Hulme PE, Hülber K, Jarošík V, Kleinbauer I,**  
676 **Krausmann F, Kühn I, Nentwig W, et al. 2011.** Socioeconomic legacy yields an invasion  
677 debt. *Proceedings of the National Academy of Sciences* **108**: 203–207.
- 678 **Excoffier L, Foll M, Petit RJ. 2009.** Genetic consequences of range expansions. *Annual Review*  
679 *of Ecology, Evolution, and Systematics* **40**: 481–501.
- 680 **Faillace CA, Lorusso NS, Duffy S. 2017.** Overlooking the smallest matter: viruses impact  
681 biological invasions. *Ecology Letters* **EarlyView**.
- 682 **Felker-Quinn E, Schweitzer JA, Bailey JK. 2013.** Meta-analysis reveals evolution in invasive  
683 plant species but little support for Evolution of Increased Competitive Ability (EICA).  
684 *Ecology and Evolution* **3**: 739–751.
- 685 **Fierer N, Jackson JA, Vilgalys R, Jackson RB. 2005.** Assessment of soil microbial community  
686 structure by use of taxon-specific quantitative PCR assays. *Applied and Environmental*  
687 *Microbiology* **71**: 4117–4120.
- 688 **Fierer N, Jackson RB. 2006.** The diversity and biogeography of soil bacterial communities.  
689 *Proceedings of the National Academy of Sciences* **103**: 626–631.
- 690 **Finkel OM, Burch AY, Lindow SE, Post AF, Belkin S. 2011.** Geographical location  
691 determines the population structure in phyllosphere microbial communities of a salt-  
692 excreting desert tree. *Applied and Environmental Microbiology* **77**: 7647–7655.
- 693 **Finkel OM, Delmont TO, Post AF, Belkin S. 2016.** Metagenomic signatures of bacterial  
694 adaptation to life in the phyllosphere of a salt-secreting desert tree. *Applied and*  
695 *Environmental Microbiology* **82**: 2854–2861.
- 696 **Fitzpatrick C; Lu-Irving P; Copeland J; Guttman DS; Wang PW; Baltrus DA; Dlugosch**  
697 **KM; Johnson MTJ.** Chloroplast sequence variation and the efficacy of peptide nucleic acids  
698 for blocking host amplification in plant microbiome studies. *Microbiome* **In minor revision**
- 699 **Fonseca-García C, Coleman-Derr D, Garrido E, Visel A, Tringe SG, Partida-Martínez LP.**

- 700       **2016.** The cacti microbiome: interplay between habitat-filtering and host-specificity.  
701       *Frontiers in Microbiology* **7**: 150.
- 702       **Garbeva P, van Veen JA, van Elsas JD. 2004.** Microbial diversity in soil: selection microbial  
703       populations by plant and soil type and implications for disease suppressiveness. *Annual*  
704       *Review of Phytopathology* **42**: 243–270.
- 705       **Gerlach JD. 1997.** How the West was lost: reconstructing the invasion dynamics of yellow  
706       starthistle and other plant invaders of western rangelands and natural areas. *California Exotic*  
707       *Pest Plant Council Symposium Proceedings* **3**: 67–72.
- 708       **Gibbons SM, Lekberg Y, Mummey DL, Sangwan N, Ramsey PW, Gilbert JA, Shade A.**  
709       **2017.** Invasive plants rapidly reshape soil properties in a grassland ecosystem. *mSystems* **2**:  
710       e00178–16.
- 711       **Griffin D, Anchukaitis KJ. 2014.** How unusual is the 2012–2014 California drought?  
712       *Geophysical Research Letters* **41**: 2014GL062433.
- 713       **Gundale MJ, Almeida JP, Wallander H, Wardle DA, Kardol P, Nilsson M-C, Fajardo A,**  
714       **Pauchard A, Peltzer DA, Ruotsalainen S, et al. 2016.** Differences in endophyte  
715       communities of introduced trees depend on the phylogenetic relatedness of the receiving  
716       forest. *The Journal of Ecology* **104**: 1219–1232.
- 717       **Gundale MJ, Kardol P, Nilsson M-C, Nilsson U, Lucas RW, Wardle DA. 2014.** Interactions  
718       with soil biota shift from negative to positive when a tree species is moved outside its native  
719       range. *The New Phytologist* **202**: 415–421.
- 720       **Haney CH, Samuel BS, Bush J, Ausubel FM. 2015.** Associations with rhizosphere bacteria can  
721       confer an adaptive advantage to plants. *Nature Plants* **1**.
- 722       **Herrera Paredes S, Lebeis SL. 2016.** Giving back to the community: microbial mechanisms of  
723       plant–soil interactions. *Functional Ecology* **30**: 1043–1052.
- 724       **Hierro JL, Khetsuriani L, Andonian K, Eren Ö, Villarreal D, Janoian G, Reinhart KO,**  
725       **Callaway RM. 2017.** The importance of factors controlling species abundance and  
726       distribution varies in native and non-native ranges. *Ecography* **40**: 991–1002.
- 727       **Hierro JL, Lortie CJ, Villarreal D, Estanga-Mollica ME, Callaway RM. 2011.** Resistance to  
728       *Centaurea solstitialis* invasion from annual and perennial grasses in California and  
729       Argentina. *Biological Invasions* **13**: 2249–2259.
- 730       **Hill MO. 1973.** Diversity and evenness: a unifying notation and its consequences. *Ecology* **54**:



- 731 427–432.
- 732 **Hooper DU, Dukes JS. 2010.** Functional composition controls invasion success in a California  
733 serpentine grassland. *The Journal of Ecology* **98**: 764–777.
- 734 **Hulvey KB, Zavaleta ES. 2012.** Abundance declines of a native forb have nonlinear impacts on  
735 grassland invasion resistance. *Ecology* **93**: 378–388.
- 736 **Huot B, Yao J, Montgomery BL, He SY. 2014.** Growth–defense tradeoffs in plants: a  
737 balancing act to optimize fitness. *Molecular Plant* **7**: 1267–1287.
- 738 **Hsieh TC, Ma KH, Chao A. 2016.** iNEXT: an R package for rarefaction and extrapolation of  
739 species diversity (Hill numbers). *Methods in Ecology and Evolution* **7**: 1451–1456.
- 740 **Johansen RB, Johnston P, Mieczkowski P, Perry GLW, Robeson MS, Vilgalys R, Burns  
741 BR. 2017.** Scattered far and wide: A broadly distributed temperate dune grass finds familiar  
742 fungal root associates in its invasive range. *Soil Biology & Biochemistry* **112**: 177–190.
- 743 **Keane R, Crawley MJ. 2002.** Exotic plant invasions and the enemy release hypothesis. *Trends  
744 in Ecology & Evolution* **17**: 164–170.
- 745 **Kozich JJ, Westcott SL, Baxter NT, Highlander SK, Schloss PD. 2013.** Development of a  
746 dual-index sequencing strategy and curation pipeline for analyzing amplicon sequence data  
747 on the MiSeq Illumina sequencing platform. *Applied and Environmental Microbiology* **79**:  
748 5112–5120.
- 749 **Kulmatiski A, Beard KH, Stevens JR, Cobbold SM. 2008.** Plant–soil feedbacks: a meta-  
750 analytical review. *Ecology Letters* **11**: 980–992.
- 751 **Lankau RA. 2011.** Resistance and recovery of soil microbial communities in the face of *Alliaria*  
752 *petiolata* invasions. *The New Phytologist* **189**: 536–548.
- 753 **Lankau RA, Keymer DP. 2018.** Simultaneous adaptation and maladaptation of tree populations  
754 to local rhizosphere microbial communities at different taxonomic scales. *The New  
755 Phytologist* **217**: 1267–1278.
- 756 **Lebeis SL, Paredes SH, Lundberg DS, Breakfield N, Gehring J, McDonald M, Malfatti S,  
757 Glavina del Rio T, Jones CD, Tringe SG, *et al.* 2015.** Salicylic acid modulates colonization  
758 of the root microbiome by specific bacterial taxa. *Science* **349**: 860–864.
- 759 **Leff JW, Lynch RC, Kane NC, Fierer N. 2016.** Plant domestication and the assembly of  
760 bacterial and fungal communities associated with strains of the common sunflower,  
761 *Helianthus annuus*. *The New Phytologist* **214**: 412–423.

- 762 **Legendre P, Gallagher ED. 2001.** Ecologically meaningful transformations for ordination of  
763 species data. *Oecologia* **129**: 271–280.
- 764 **Legendre P, Legendre L. 1998.** *Numerical Ecology*. Amsterdam: Elsevier Science.
- 765 **Levine JM, Adler PB, Yelenik SG. 2004.** A meta-analysis of biotic resistance to exotic plant  
766 invasions. *Ecology Letters* **7**: 975–989.
- 767 **Lonsdale WM. 1999.** Global patterns of plant invasions and the concept of invasibility. *Ecology*  
768 **80**: 1522–1536.
- 769 **Louca S, Jacques SMS, Pires APF, Leal JS, Srivastava DS, Parfrey LW, Farjalla VF,  
770 Doebeli M. 2016.** High taxonomic variability despite stable functional structure across  
771 microbial communities. *Nature Ecology & Evolution* **1**: s41559–016–0015.
- 772 **Lundberg DS, Lebeis SL, Paredes SH, Yourstone S, Gehring J, Malfatti S, Tremblay J,  
773 Engelbrektson A, Kunin V, del Rio TG, et al. 2012.** Defining the core *Arabidopsis*  
774 *thaliana* root microbiome. *Nature* **488**: 86–90.
- 775 **Lundberg DS, Yourstone S, Mieczkowski P, Jones CD, Dangl JL. 2013.** Practical innovations  
776 for high-throughput amplicon sequencing. *Nature Methods* **10**: 999–1002.
- 777 **Maron JL, Klironomos J, Waller L, Callaway RM. 2014.** Invasive plants escape from  
778 suppressive soil biota at regional scales. *The Journal of Ecology* **102**: 19–27.
- 779 **Maron JL, Vilà M. 2001.** When do herbivores affect plant invasion? Evidence for the natural  
780 enemies and biotic resistance hypotheses. *Oikos* **95**: 361–373.
- 781 **McDonald D, Price MN, Goodrich J, Nawrocki EP, DeSantis TZ, Probst A, Andersen GL,  
782 Knight R, Hugenholtz P. 2012.** An improved Greengenes taxonomy with explicit ranks for  
783 ecological and evolutionary analyses of bacteria and archaea. *The ISME Journal* **6**: 610–618.
- 784 **McGinn KJ, van der Putten WH, Duncan RP, Shelby N, Weser C, Hulme PE. 2016.**  
785 *Trifolium* species associate with a similar richness of soil-borne mutualists in their introduced  
786 and native ranges. *Journal of Biogeography* **43**: 944–954.
- 787 **McGinn KJ, van der Putten WH, Hulme PE, Shelby N, Weser C, Duncan RP. 2018.** The  
788 influence of residence time and geographic extent on the strength of plant-soil feedbacks for  
789 naturalised *Trifolium*. *The Journal of Ecology* **106**: 207–217.
- 790 **McQuitty LL. 1966.** Similarity analysis by reciprocal pairs for discrete and continuous data.  
791 *Educational and Psychological Measurement* **26**: 825–831.
- 792 **Mitchell CE, Agrawal AA, Bever JD, Gilbert GS, Hufbauer RA, Klironomos JN, Maron**

- 793 **JL, Morris WF, Parker IM, Power AG, et al. 2006.** Biotic interactions and plant invasions.  
794 *Ecology Letters* **9**: 726–740.
- 795 **Nemergut DR, Schmidt SK, Fukami T, O’Neill SP, Bilinski TM, Stanish LF, Knelman JE,**  
796 **Darcy JL, Lynch RC, Wickey P, et al. 2013.** Patterns and processes of microbial  
797 community assembly. *Microbiology and Molecular Biology Reviews* **77**: 342–356.
- 798 **Newton AC, Fitt BDL, Atkins SD, Walters DR, Daniell TJ. 2010.** Pathogenesis, parasitism  
799 and mutualism in the trophic space of microbe–plant interactions. *Trends in Microbiology*  
800 **18**: 365–373.
- 801 **Oksanen J, Blanchet FG, Friendly M, Kindt R, Legendre P, McGlenn D, Minchin PR,**  
802 **O’Hara RB, Simpson GL, Solymos P, et al. 2016.** vegan: community ecology package. R  
803 package version 2.4-3.
- 804 **Parker IM, Gilbert GS. 2007.** When there is no escape: the effects of natural enemies on native,  
805 invasive, and noninvasive plants. *Ecology* **88**: 1210–1224.
- 806 **Pearson DE, Ortega YK, Eren Ö, Hierro JL. 2018.** Community assembly theory as a  
807 framework for biological invasions. *Trends in Ecology & Evolution* **33**: 313–325.
- 808 **Peiffer JA, Spor A, Koren O, Jin Z, Tringe SG, Dangl JL, Buckler ES, Ley RE. 2013.**  
809 Diversity and heritability of the maize rhizosphere microbiome under field conditions.  
810 *Proceedings of the National Academy of Sciences* **110**: 6548–6553.
- 811 **Petermann JS, Fergus AJF, Turnbull LA, Schmid B. 2008.** Janzen-Connell effects are  
812 widespread and strong enough to maintain diversity in grasslands. *Ecology* **89**: 2399–2406.
- 813 **Pielou EC. 1966.** The measurement of diversity in different types of biological collections.  
814 *Journal of Theoretical Biology* **13**: 131–144.
- 815 **Pitcairn M, Schoenig S, Yacoub R, Gendron J. 2006.** Yellow starthistle continues its spread in  
816 California. *California Agriculture* **60**: 83–90.
- 817 **R Core Team. 2015.** *R: a language and environment for statistical computing*. Vienna, Austria:  
818 R Foundation for Statistical Computing.
- 819 **Ramette A. 2007.** Multivariate analyses in microbial ecology. *FEMS Microbiology Ecology* **62**:  
820 142–160.
- 821 **Reinhart KO, Callaway RM. 2006.** Soil biota and invasive plants. *The New Phytologist* **170**:  
822 445–457.
- 823 **Reinhart KO, Packer A, Van der Putten WH, Clay K. 2003.** Plant–soil biota interactions and

- 824 spatial distribution of black cherry in its native and invasive ranges. *Ecology Letters* **6**: 1046–  
825 1050.
- 826 **Reinhart KO, Tytgat T, Van der Putten WH, Clay K. 2010.** Virulence of soil-borne  
827 pathogens and invasion by *Prunus serotina*. *The New Phytologist* **186**: 484–495.
- 828 **Rout ME, Callaway RM. 2012.** Interactions between exotic invasive plants and soil microbes in  
829 the rhizosphere suggest that ‘everything is not everywhere’. *Annals of Botany* **110**: 213–222.
- 830 **Schnitzer SA, Klironomos JN, HilleRisLambers J, Kinkel LL, Reich PB, Xiao K, Rillig  
831 MC, Sikes BA, Callaway RM, Mangan SA, et al. 2011.** Soil microbes drive the classic  
832 plant diversity–productivity pattern. *Ecology* **92**: 296–303.
- 833 **Schrama M, Bardgett RD. 2016.** Grassland invasibility varies with drought effects on soil  
834 functioning. *The Journal of Ecology* **104**: 1250–1258.
- 835 **Seabloom EW, Harpole WS, Reichman OJ, Tilman D. 2003.** Invasion, competitive  
836 dominance, and resource use by exotic and native California grassland species. *Proceedings  
837 of the National Academy of Sciences* **100**: 13384–13389.
- 838 **Shannon CE. 1948.** A mathematical theory of communication. *Bell System Technical Journal*  
839 **27**: 379–423.
- 840 **Smakowska E, Kong J, Busch W, Belkhadir Y. 2016.** Organ-specific regulation of growth-  
841 defense tradeoffs by plants. *Current Opinion in Plant Biology* **29**: 129–137.
- 842 **terHorst CP, Lennon JT, Lau JA. 2014.** The relative importance of rapid evolution for plant-  
843 microbe interactions depends on ecological context. *Proceedings of the Royal Society:  
844 Biological Sciences* **281**: 20140028.
- 845 **terHorst CP, Zee PC. 2016.** Eco-evolutionary dynamics in plant–soil feedbacks. *Functional  
846 Ecology* **30**: 1062–1072.
- 847 **Torchin ME, Mitchell CE. 2004.** Parasites, pathogens, and invasions by plants and animals.  
848 *Frontiers in Ecology and the Environment* **2**: 183–190.
- 849 **Uller T, Leimu R. 2011.** Founder events predict changes in genetic diversity during human-  
850 mediated range expansions. *Global Change Biology* **17**: 3478–3485.
- 851 **Uygur S, Smith L, Uygur FN, Cristofaro M, Balciunas J. 2004.** Population densities of yellow  
852 starthistle (*Centaurea solstitialis*) in Turkey. *Weed Science* **52**: 746–753.
- 853 **Vandenkoornhuysen P, Quaiser A, Duhamel M, Le Van A, Dufresne A. 2015.** The importance  
854 of the microbiome of the plant holobiont. *The New Phytologist* **206**: 1196–1206.

855 **van der Putten WH, Bardgett RD, Bever JD, Bezemer TM, Casper BB, Fukami T, Kardol**  
856 **P, Klironomos JN, Kulmatiski A, Schweitzer JA, et al. 2013.** Plant–soil feedbacks: the  
857 past, the present and future challenges. *The Journal of Ecology* **101**: 265–276.

858 **van der Putten WH, Bradford MA, Pernilla Brinkman E, van de Voorde TFJ, Veen GF.**  
859 **2016.** Where, when and how plant–soil feedback matters in a changing world. *Functional*  
860 *Ecology* **30**: 1109–1121.

861 **Venables WN, Ripley BD. 2002.** *Statistics and computing: modern applied statistics with S.*  
862 New York, NY, USA: Springer.

863 **Wagg C, Bender SF, Widmer F, van der Heijden MGA. 2014.** Soil biodiversity and soil  
864 community composition determine ecosystem multifunctionality. *Proceedings of the*  
865 *National Academy of Sciences* **111**: 5266–5270.

866 **Wickham H. 2009.** *ggplot2: elegant graphics for data analysis.* New York: Springer-Verlag.

867 **Widmer TL, Guermache F, Dolgovskaia MY, Reznik SY. 2007.** Enhanced growth and seed  
868 properties in introduced vs. native populations of yellow starthistle (*Centaurea solstitialis*).  
869 *Weed Science* **55**: 465–473.

870 **Zavaleta ES, Hulvey KB. 2004.** Realistic species losses disproportionately reduce grassland  
871 resistance to biological invaders. *Science* **306**: 1175–1177.

872

### 873 **SUPPORTING INFORMATION**

874 **Fig. S1.** Frequency distributions of readcounts per sample.

875 **Fig. S2.** NMDS plot of OTU composition across all sample types.

876 **Fig. S3.** Clustering dendrograms for bulk samples from three plant compartments.

877 **Fig. S4.** Heat maps showing relative abundance of top 25 OTUs per bulk sample from three plant  
878 compartments.

879 **Table S1.** Collecting information for populations sampled in this study.

880 **Table S2.** Extent of host chloroplast amplification with different PNA clamps.

881 **Table S3.** Axis loadings from Principal Component Analysis of three plant compartments.

882

### 883 **FIGURE LEGENDS**

884 **Fig. 1.** The distribution (gray) of yellow starthistle and sampling sites (circles) for this study.

885 Maps detail the native range in Eurasia (a) and the invasion of western North America (b).

886 Previous work has indicated that western Europe is the source for the severe invasion of  
887 California, USA (both in dark shading; Barker et al. 2017). Sampling included seven locations in  
888 California (b, filled circles), six locations in western Europe and an additional two locations in  
889 eastern Europe (a, open circles).

890

891 **Fig 2.** NMDS plots of bacterial OTU composition in phyllosphere (green), endorhizosphere  
892 (light blue), and ectorhizosphere (dark blue) samples from native (open symbols) and invaded  
893 (closed symbols) ranges. Plotted are a) pooled samples for each sampling location, showing  
894 overall separation by range within compartment (stress = 0.14), and b) whole root samples for  
895 individual plants within native and invading populations (stress = 0.16). Ellipses indicate 95%  
896 confidence intervals for samples grouped by range (native range: dashed lines; invaded range:  
897 solid lines).

898

899 **Fig 3.** Relative abundance of (proportion of reads mapping to) phyla in yellow starthistle  
900 phyllosphere, ectorhizosphere, and endorhizosphere samples from native and invaded ranges.

901

902 **Fig 4.** Distributions of OTU (a) richness, (b) evenness, and (c,d) diversity ( $e^H$ ) among samples  
903 (pooled plants) from each location in the native and invaded ranges for phyllosphere,  
904 ectorhizosphere, and endorhizosphere compartments. (a-c) show values for all OTUs and (d)  
905 shows values based on OTUs from known pathogen-containing genera. Significant differences  
906 from Kruskal-Wallis tests are indicated with asterisks:  $*P < 0.05$ ,  $(*)P < 0.1$ .

907

908 **Fig 5.** Distributions of endorhizosphere OTU (a) richness, (b) evenness, and (c,d) diversity ( $e^H$ )  
909 among individual plants at each location in the native and invaded ranges. (a-c) show values for  
910 all OTUs and (d) shows values based on OTUs from known pathogen-containing genera.

911 Significant differences from Kruskal-Wallis tests are indicated with asterisks:  $*P < 0.05$ ,  $(*)P <$   
912 0.1.

913

914 **Fig 6.** Bacterial diversity ( $e^H$ ) in endorhizosphere samples pooled by sampling location, as a  
915 function of the genetic diversity among plants at the same sites (calculated as the average  
916 proportion of pairwise nucleotide differences between alleles ( $\pi$ ) at variable positions in the

917 genome; from Barker *et al.*, 2017). Lines show significant positive relationships (linear model:  $P$   
918 = 0.02) between microbial and plant diversity at sampling locations in both the native range  
919 (open symbols, dashed line) and the invaded range (closed symbols, solid line).  
920

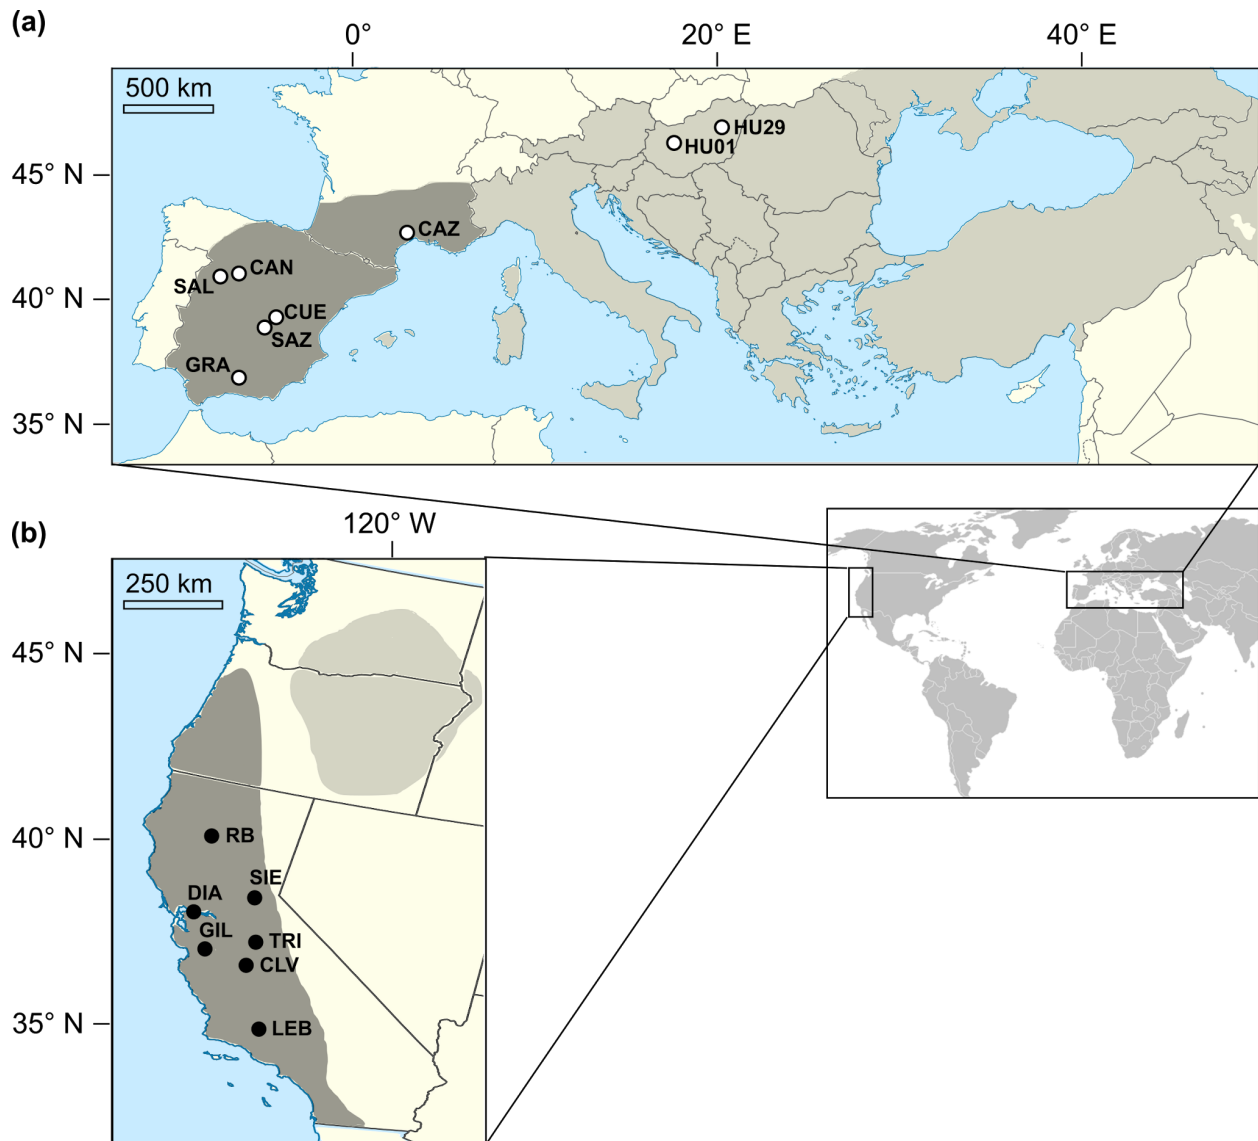

**Fig. 1** The distribution (gray) of yellow starthistle and sampling sites (circles) for this study. Maps detail the native range in Eurasia (a) and the invasion of western North America (b). Previous work has indicated that western Europe is the source for the severe invasion of California, USA (both in dark shading; Barker et al. 2017). Sampling included seven locations in California (b, filled circles), six locations in western Europe and an additional two locations in eastern Europe (a, open circles).



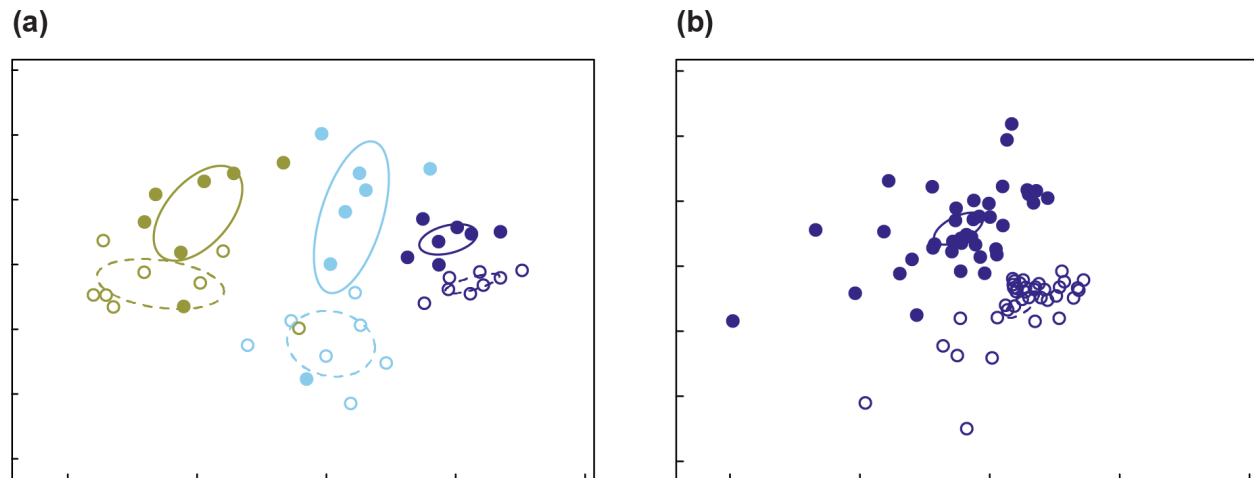

**Fig 2.** NMDS plots of bacterial OTU composition in phyllosphere (green), endorhizosphere (light blue), and ectorhizosphere (dark blue) samples from native (open symbols) and invaded (closed symbols) ranges. Plotted are a) pooled samples for each sampling location, showing overall separation by range within compartment (stress = 0.14), and b) whole root samples for individual plants within native and invading populations (stress = 0.16). Ellipses indicate 95% confidence intervals for samples grouped by range (native range: dashed lines; invaded range: solid lines).

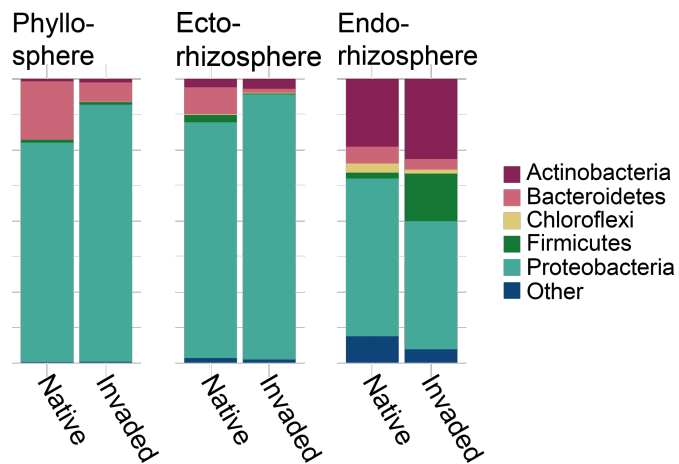

**Fig 3.** Relative abundance of (proportion of reads mapping to) phyla in yellow starthistle phyllosphere, ectorhizosphere, and endorhizosphere samples from native and invaded ranges.

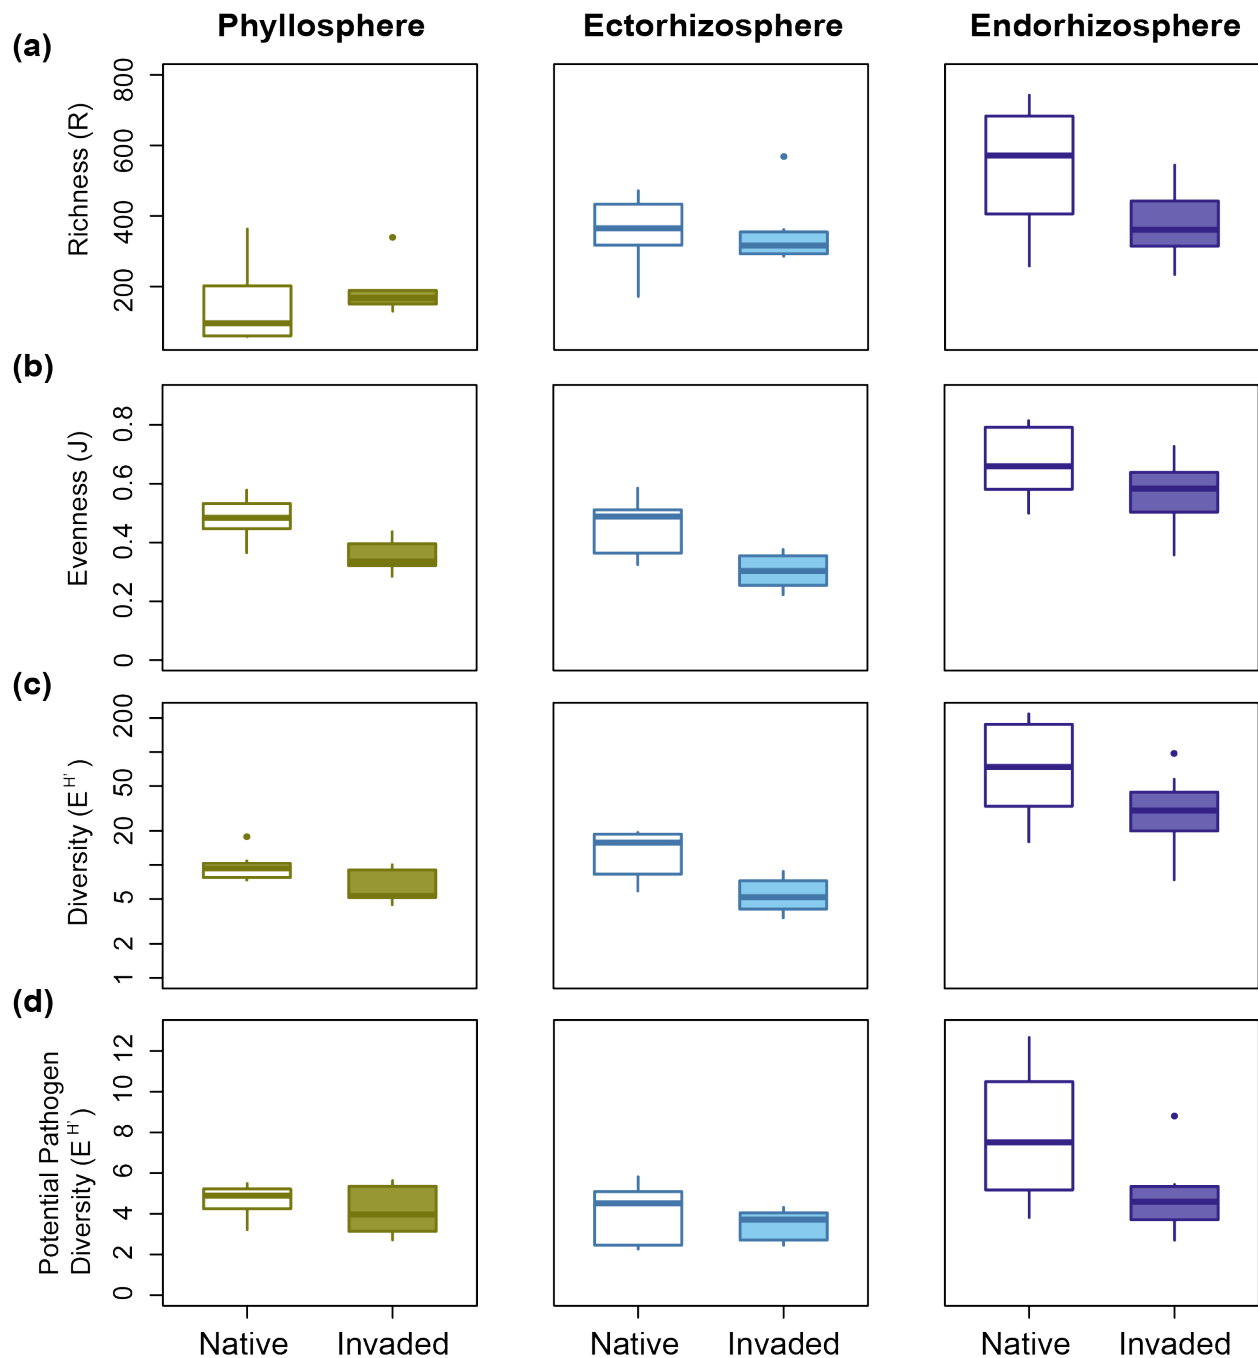

**Fig 4.** Distributions of OTU (a) richness, (b) evenness, and (c,d) diversity ( $E^H$ ) among samples (pooled plants) from each location in the native and invaded ranges for phyllosphere, ectorrhizosphere, and endorhizosphere compartments. (a-c) show values for all OTUs and (d) shows values based on OTUs from known pathogen-containing genera. Significant differences from Kruskal-Wallis tests are indicated with asterisks: \* $P < 0.05$ , (\* $P < 0.1$ .

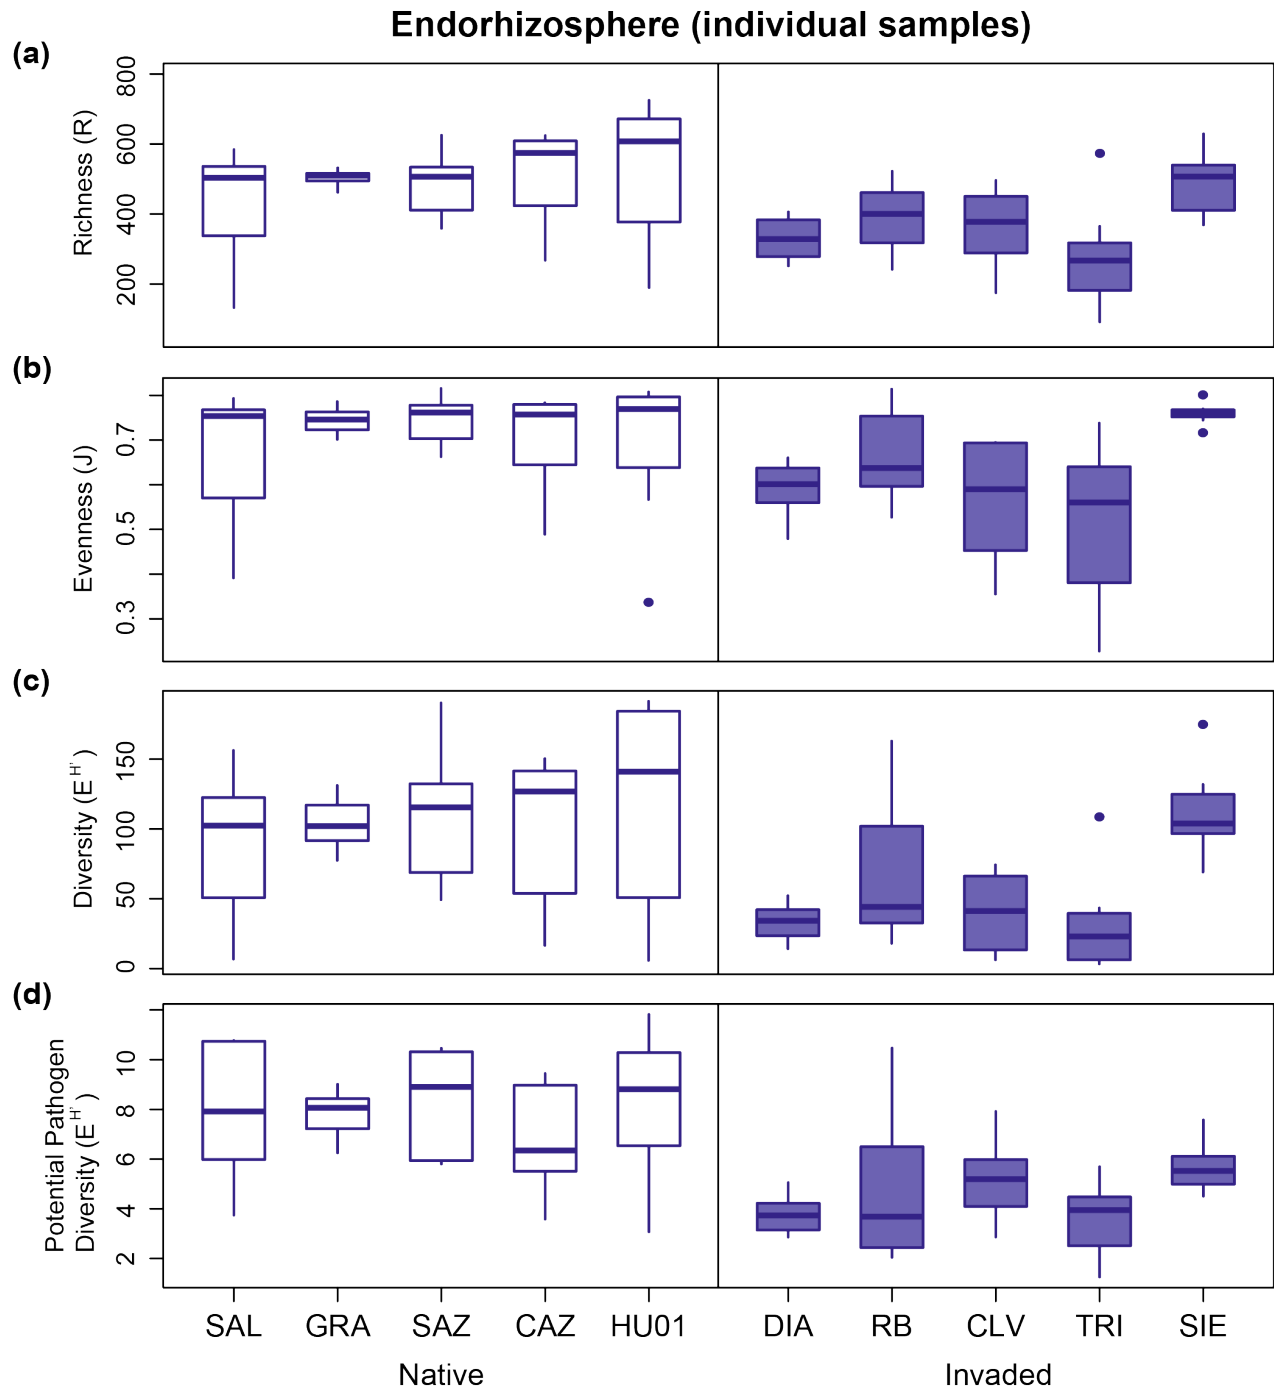

**Fig 5:** Distributions of endorhizosphere OTU (a) richness, (b) evenness, and (c,d) diversity ( $e^H$ ) among individual plants at each location in the native and invaded ranges. (a-c) show values for all OTUs and (d) shows values based on OTUs from known pathogen-containing genera. Significant differences from Kruskal-Wallis tests are indicated with asterisks:  $*P < 0.05$ ,  $(*)P < 0.1$ .

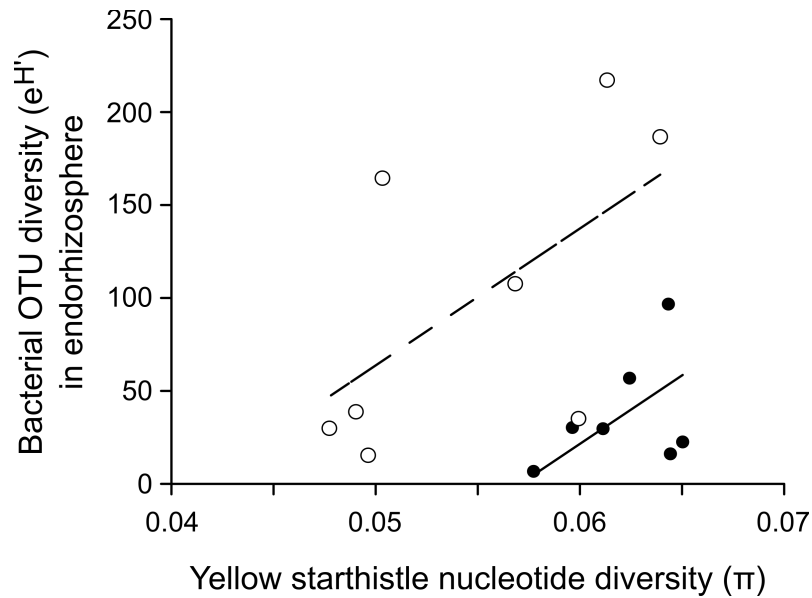

**Fig 6.** Bacterial diversity ( $e^{H'}$ ) in endorhizosphere samples pooled by sampling location, as a function of the genetic diversity among plants at the same sites (calculated as the average proportion of pairwise nucleotide differences between alleles ( $\pi$ ) at variable positions in the genome; from Barker *et al.*, 2017). Lines show significant positive relationships (linear model:  $P = 0.02$ ) between microbial and plant diversity at sampling locations in both the native range (open symbols, dashed line) and the invaded range (closed symbols, solid line).

## Supporting Information

**Fig. S1** Frequency distributions of un-rarefied read counts for samples from all four plant compartments (native and invading population samples combined), as well as control (blank) samples. Vertical red lines indicate thresholds for rarefaction where relevant.

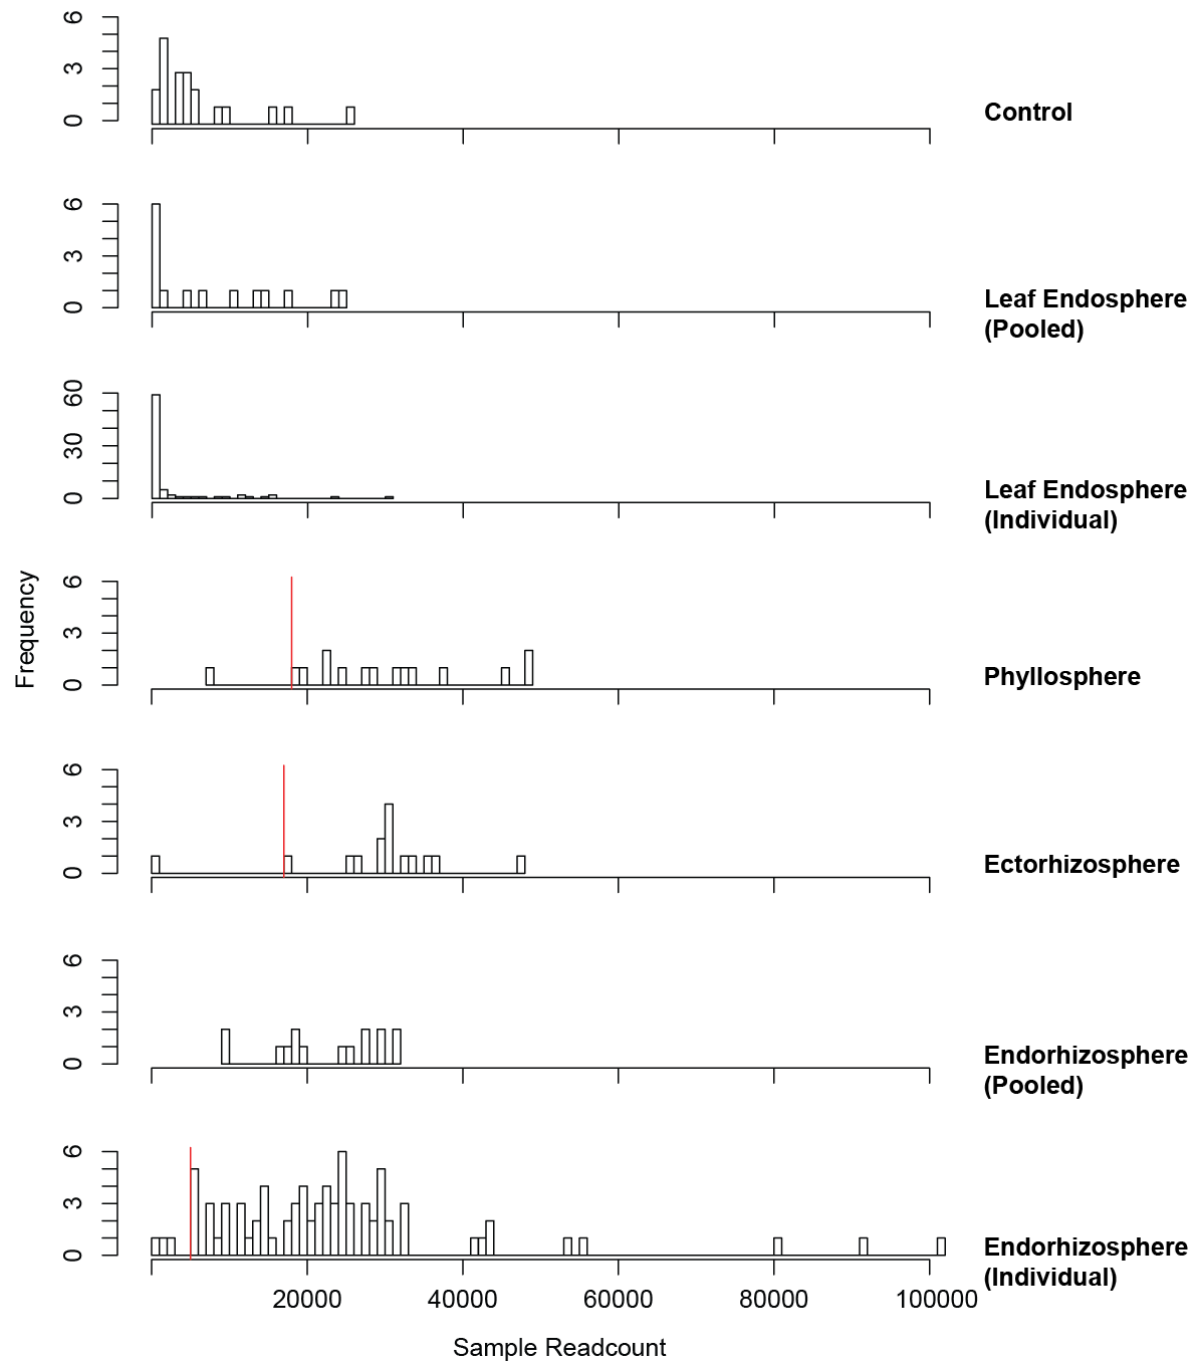

**Fig. S2** NMDS plot of bacterial OTU composition in unrarefied control, phyllosphere, leaf endosphere, ectorhizosphere, and endorhizosphere samples (stress = 0.10).

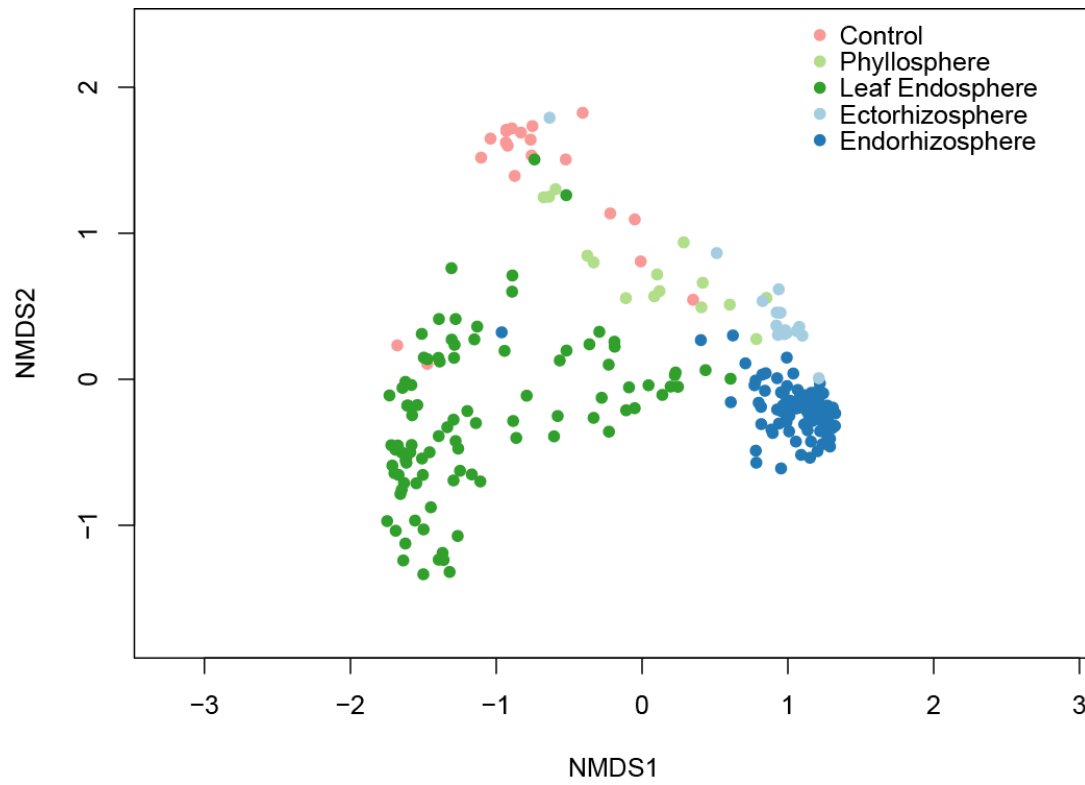

**Fig. S3** Yellow starthistle populations clustered according to Bray-Curtis dissimilarity between rarefied, square-root transformed pooled samples from three plant compartments.

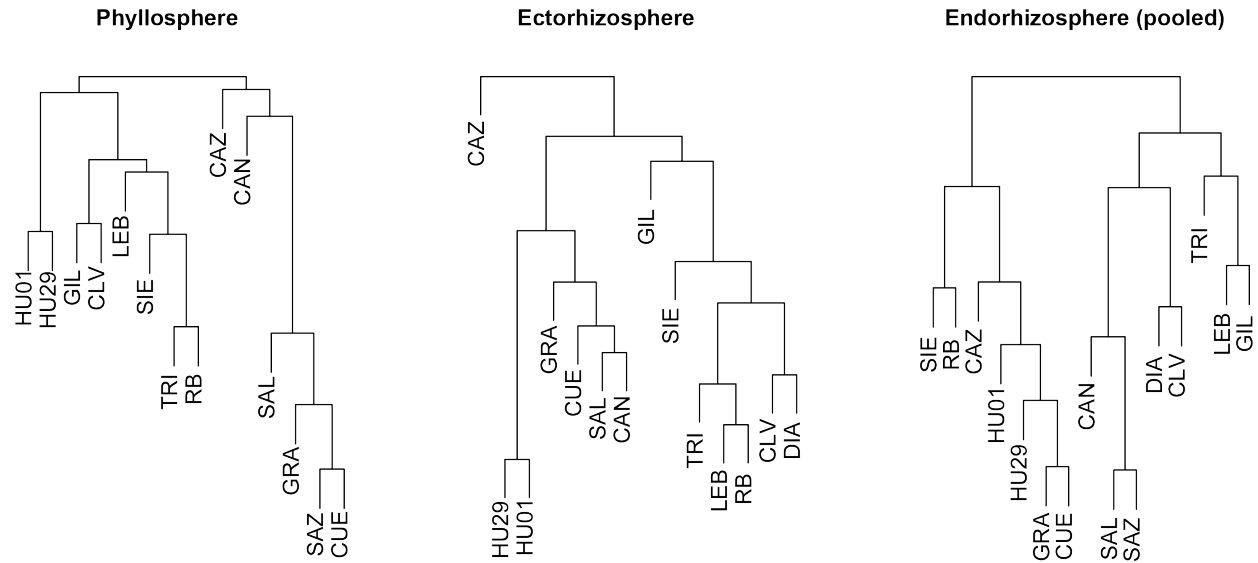

**Fig. S4** Heat maps showing the fraction of reads mapping to each of the top 25 OTUs in rarefied bulk samples from three plant compartments. The top five OTUs contributing to the first principal component separating native and invaded samples in each compartment are indicated with an asterisk. Taxonomic assignments for each OTU are given to the lowest taxonomic rank identified.

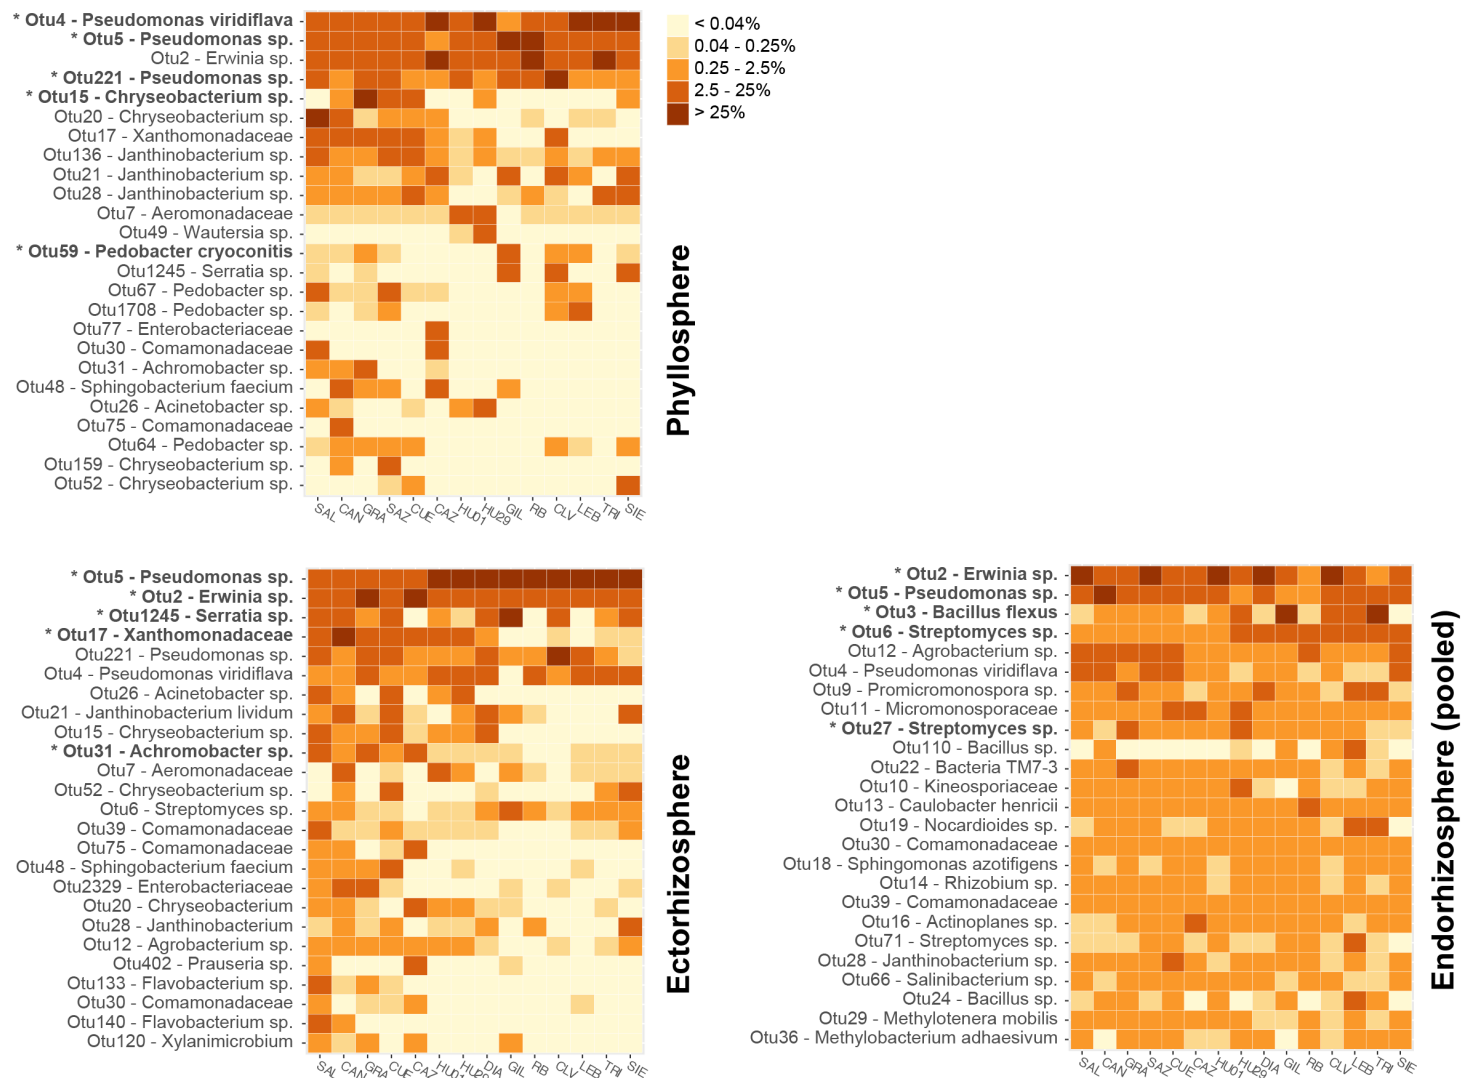



**Fig. S5** Proportion of rarefied read counts assigned to pathogen-containing genera in all samples according to plant compartment and range.

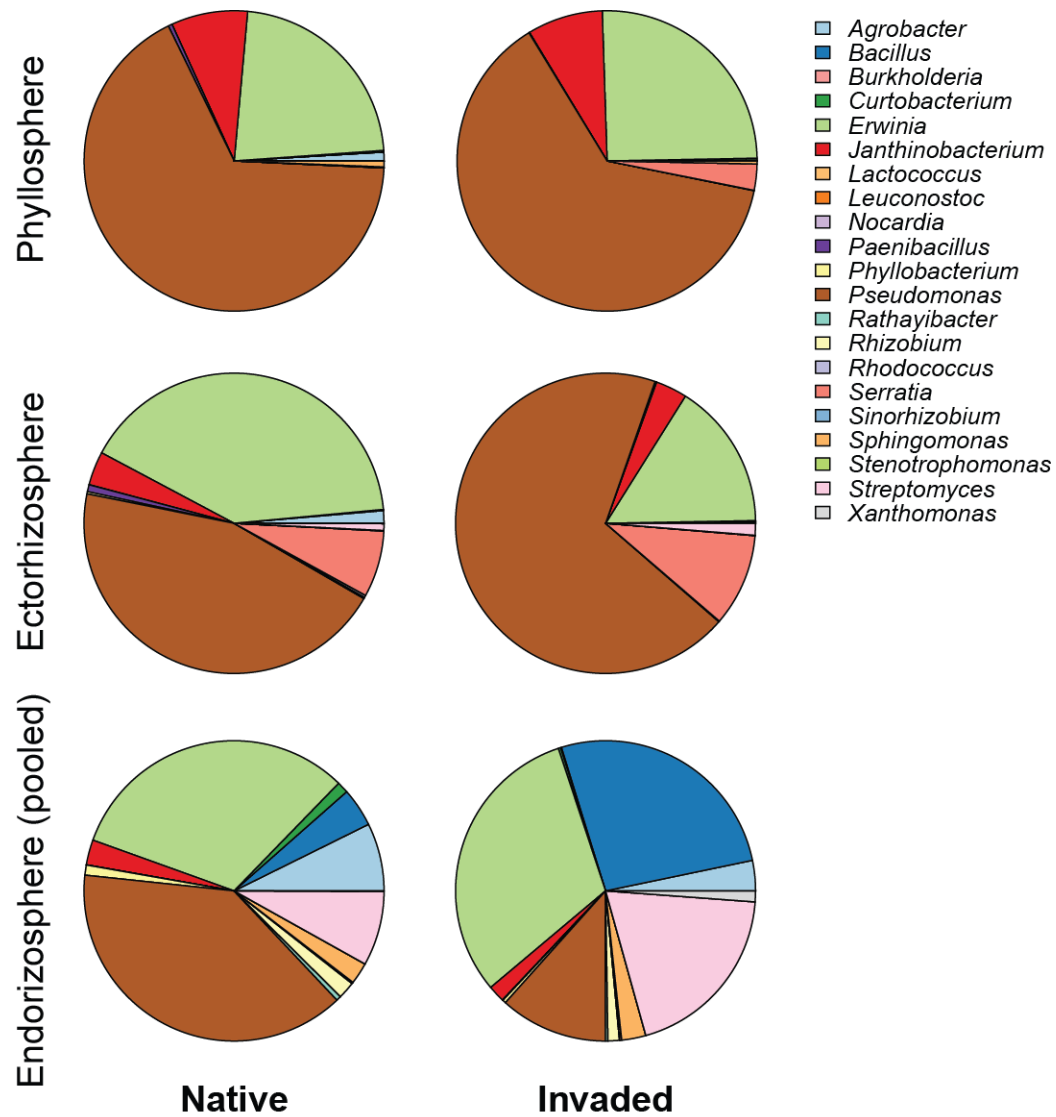

**Table S1** Collecting information for populations sampled in this study, including designation codes, localities, coordinates, sampling dates, and specimen accession numbers of plant collections at ARIZ.

| Code | Lat.      | Long.      | Locality                                                                                                                                                                   | Date      | ARIZ specimen numbers                                                                                                                                                                                          |
|------|-----------|------------|----------------------------------------------------------------------------------------------------------------------------------------------------------------------------|-----------|----------------------------------------------------------------------------------------------------------------------------------------------------------------------------------------------------------------|
| SAL  | N40.99112 | W005.65831 | Avenida de la Merced, ~1.5km N of Salamanca. Dirt path between road and field, on E side of road.                                                                          | 22-Jun-15 | 426137, 426032, 425636, 426125, 426034, 426033, 426035, 426126, 426140, 426068, 426127, 426128, 426129, 426130, 426131, 426132, 426133, 426134, 426135, 426136, 426138, 425635, 426139                         |
| CAN  | N41.00085 | W004.89715 | Junction AV800 & road to Canales. On E side of Canales road, in the narrow strip between road and field edge.                                                              | 22-Jun-15 | 425643, 426065, 426064, 426063, 426055, 426054, 425646, 426067, 426053, 426052, 425642, 426066, 426051, 425641, 426062, 426061, 426059, 426058, 426060, 426057, 426056                                         |
| GRA  | N37.26843 | W003.66488 | GR300 ~100m from junction w 213, ~20m up dirt path to the E side of the road. Weedy waste area near edge of olive orchard.                                                 | 23-Jun-15 | 425716, 425715, 425714, 425713, 425739, 425738, 425737, 425736, 425735, 425734, 425733, 425732, 425728, 425740, 425729, 425711, 425702, 425703, 425704, 425705, 425706, 425707, 425708, 425709, 425710         |
| SAZ  | N39.83529 | W002.50997 | Gravel road by W side of CM3118 (road to Villares del Saz), just next to underpass under A3. Dirt farming path (for tractors) on S side of road, between sunflower fields. | 24-Jun-15 | 425678, 425741, 425679, 425731, 425680, 425681, 425682, 425683, 425684, 425685, 425757, 425755, 425753, 425751, 425749, 425746, 425744, 425743, 425758, 425756, 425752, 425750, 425748, 425747, 425745, 425742 |
| CUE  | N40.12939 | W002.13880 | CM2105 between Cuenca & Tragacete ~8km W of Cuenca. Gravel road to the N of 2105, between field and river.                                                                 | 24-Jun-15 | 425424, 425421, 425420, 425423, 425425, 425426                                                                                                                                                                 |
| CAZ  | N43.74958 | E003.77119 | D113, ~1km from junction w 986, near Cazevielle. Flat, gravelly turnout & intersection w unpaved road, & gravelly roadsides.                                               | 20-Jun-15 | 425691, 425690, 425971, 425688, 425689, 425972, 425692, 425970, 425693                                                                                                                                         |
| HU01 | N47.18240 | E18.08928  | Unnamed dirt roads about 200m NW of E66/8, running parallel. Access by perpendicular unnamed paved road.                                                                   | 7-Jul-15  | 425655, 425660, 425661, 425653, 425652, 425658, 425657, 425656, 425654, 425631, 425687, 425634, 425633, 425686, 425630, 425628, 425629, 425627, 425662                                                         |

|      |           |            |                                                                                                                                                                           |           |                                                                                                                                                                                                        |
|------|-----------|------------|---------------------------------------------------------------------------------------------------------------------------------------------------------------------------|-----------|--------------------------------------------------------------------------------------------------------------------------------------------------------------------------------------------------------|
| HU29 | N47.31785 | E21.03385  | Margin of irrigation ditch bordered by hay and sunflower fields on one side and service road parallel to main road (E60/4) on the other side. Site to the south of E60/4. | 8-Jul-15  | 425730, 425677, 425676, 425640, 425675, 425674, 425673, 425726, 425725, 425724, 425723, 425722, 425721, 425720, 425719, 425718, 425717, 425727                                                         |
| DIA  | N37.86275 | W121.98003 | Hillside to the West of parking lot at the end of Green Valley Road.                                                                                                      | 8-Jun-15  | 425394, 425400, 425401, 425402, 425403, 425404, 425405, 425406, 425407, 425408, 425409, 425115, 425381, 425410, 425382, 425383, 425384, 425385, 425386, 425387, 425388, 425389, 425390, 425391, 425392 |
| GIL  | N37.03389 | W121.53611 | Disturbed grassy area adjacent to turn out on South side of Leavesley Rd. near intersection with New Ave. Grassy patch between road and tilled field.                     | 7-Jun-15  | 425374, 425373, 425380, 425379, 425378, 425377, 425376, 425375, 425124, 425123, 425122, 425121, 425119, 425120, 425118, 425114, 425113, 425399, 425112, 425395, 425111, 425398, 425397, 425396         |
| RB   | N40.27085 | W122.27103 | Lightly grassy patch to north-west of rest stop (Herbert S. Miles rest area) between Cottonwood and Red Bluff on southbound I-5.                                          | 9-Jun-15  | 425372, 425371, 425370, 425369, 425368, 425418, 425365, 425415, 425367, 425366, 425416, 425417, 425419                                                                                                 |
| CLV  | N36.91603 | W119.79341 | Gully on eastern side of the Yosemite fwy (41) adjacent to olive orchards.                                                                                                | 6-Jun-15  | 426046, 426045, 426044, 426043, 426042, 426036, 426037, 425637, 426038, 426039, 426040, 426041, 425639, 426026, 426027, 426028, 426029, 426030, 426031, 425638                                         |
| LEB  | N34.82844 | W118.87369 | Cal trans maintained, weedy area adjacent to SW of rest stop off of south bound I-5.                                                                                      | 5-Jun-15  | 425968, 425695, 425969, 425966, 425967, 426047, 425694, 426050, 426049, 426048                                                                                                                         |
| TRI  | N37.46159 | W119.79399 | Strip of grassland along south side of Hwy 49 at intersection with Triangle road. Strip between road and fenced off rangeland.                                            | 11-Jun-15 | 425116, 425117, 425414, 425412, 425413, 425411, 425393                                                                                                                                                 |
| SIE  | N38.78162 | W120.41639 | Site upslope of Weber Mill rd. about ¼ mile from the turnoff from Ice House road.                                                                                         | 10-Jun-15 | 425648, 425647, 425649, 425644, 425645                                                                                                                                                                 |

**Table S2** Comparison of host chloroplast blocking levels achieved by different PNA clamps in pooled endorhizosphere samples from two populations. Total read counts, number of reads mapping to host chloroplast, and host chloroplast reads as percentage of total reads are reported for each sample.

| <b>Sample</b>              | <b>plastid PNA</b>                                 | <b>total</b> | <b>chloroplast</b> | <b>% chloroplast</b> |
|----------------------------|----------------------------------------------------|--------------|--------------------|----------------------|
| CAN pooled endorhizosphere | Lundberg <i>et al.</i> 2013<br>(GGCTCAACCCTGGACAG) | 14,763       | 2,873              | 19                   |
| CAN pooled endorhizosphere | Asteraceae-specific<br>(GGCTCAACTCTGGACAG)         | 12,579       | 91                 | 1                    |
| CUE pooled endorhizosphere | Lundberg <i>et al.</i> 2013<br>(GGCTCAACCCTGGACAG) | 11,962       | 6,318              | 53                   |
| CUE pooled endorhizosphere | Asteraceae-specific<br>(GGCTCAACTCTGGACAG)         | 14,608       | 314                | 2                    |

**Table S3** Loading by top 10 individual OTUs along first principal component axis from analysis of Hellinger transformed data matrices for three plant compartments. Column A: individual OTU unique identification number; column B: individual OTU lowest taxonomic assignment; column C: axis loading per individual OTU.

| <b>Phyllosphere</b> |                                |      |
|---------------------|--------------------------------|------|
| A                   | B                              | C    |
| 15                  | <i>Chryseobacterium</i>        | 0.51 |
| 4                   | <i>Pseudomonas viridiflava</i> | 0.41 |
| 17                  | Xanthomonadaceae               | 0.32 |
| 221                 | <i>Pseudomonas</i>             | 0.27 |
| 2                   | <i>Erwinia</i>                 | 0.26 |
| 20                  | <i>Chryseobacterium</i>        | 0.22 |
| 136                 | <i>Janthinobacterium</i>       | 0.20 |
| 7                   | Aeromonadaceae                 | 0.18 |
| 49                  | <i>Wautersiella</i>            | 0.16 |
| 31                  | <i>Achromobacter</i>           | 0.16 |

| <b>Ectorhizosphere</b> |                                 |      |
|------------------------|---------------------------------|------|
| A                      | B                               | C    |
| 5                      | <i>Pseudomonas</i>              | 0.62 |
| 17                     | Xanthomonadaceae                | 0.44 |
| 31                     | <i>Achromobacter</i>            | 0.24 |
| 26                     | <i>Acinetobacter</i>            | 0.24 |
| 15                     | <i>Chryseobacterium</i>         | 0.20 |
| 48                     | <i>Sphingobacterium faecium</i> | 0.15 |
| 75                     | Comamonadaceae                  | 0.14 |
| 4                      | <i>Pseudomonas viridiflava</i>  | 0.13 |
| 221                    | <i>Pseudomonas</i>              | 0.13 |
| 2329                   | Enterobacteriaceae              | 0.12 |

| <b>Endorhizosphere</b> |                                |      |
|------------------------|--------------------------------|------|
| A                      | B                              | C    |
| 2                      | <i>Erwinia</i>                 | 0.56 |
| 3                      | <i>Bacillus flexus</i>         | 0.41 |
| 5                      | <i>Pseudomonas</i>             | 0.41 |
| 6                      | <i>Streptomyces</i>            | 0.17 |
| 10                     | Kineosporiaceae                | 0.15 |
| 11                     | Micromonosporaceae             | 0.13 |
| 4                      | <i>Pseudomonas viridiflava</i> | 0.13 |
| 27                     | <i>Streptomyces</i>            | 0.11 |
| 13                     | <i>Caulobacter henricii</i>    | 0.10 |
| 23                     | Actinomycetales                | 0.10 |
